# Supplementary material for: Synthesis and properties of insensitive [1,2,4]triazolo[4,3-b]-1,2,4,5-tetrazine explosives
Source: Royal Society of Chemistry journal article supplement (doi:10.1039/c8nj05220d), 2018-12-18
Supplement: c8nj05220d1.pdf [file c8nj05220d1.pdf]

## Supporting information

### Synthesis and Properties of Insensitive [1,2,4]Triazolo[4,3- b][1,2,4,5]tetrazine Explosives

*Guilong Wang,<sup>a</sup> Tian Lu<sup>a</sup> Guijuan Fan,<sup>b</sup> Hongquan Yin<sup>a</sup> and Fu-Xue Chen<sup>\*a</sup>*

[a] School of Chemistry and Chemical Engineering, Beijing Institute of Technology, 5 South Zhongguancun street, Beijing 100081, China E-mail: fuxue.chen@bit.edu.cn.

[b] Institute of Chemical Materials, CAEP, Mianyang 621050, China.

#### Contents

|                                               |     |
|-----------------------------------------------|-----|
| 1. Experimental Section .....                 | S1  |
| 2. Other control experiments and trials ..... | S2  |
| 3. X-ray Diffraction data .....               | S3  |
| 4. Computation details .....                  | S11 |
| 5. Copies of Spectroscopy.....                | S13 |
| 6. References.....                            | S31 |

## 1. Experimental Section

**General Information**  $^1\text{H}$  NMR and  $^{13}\text{C}$  NMR spectra were recorded on a 400 MHz (Bruker Avance 400) nuclear magnetic resonance spectrometers operating at 400 and 100 MHz, respectively.  $^{15}\text{N}$  NMR spectra were measured on a 700 MHz (Bruker Avance 700) nuclear magnetic resonance spectrometers operating at 70 MHz. FT-IR spectra were taken using KBr pellets on a Bruker ALPHA FT-IR-Spektrometer. DSC (Shimadzu TA-60ws) was employed to measure the melt points and decomposition temperatures at a scan rate of  $5\text{ }^\circ\text{C min}^{-1}$  in argon atmosphere. High resolution mass spectrometry was recorded on Bruker Apex IV FTMS.

### Procedure for Synthesis:

**Caution!** Although no dangerous situation was encountered in the synthesis of these energetic materials, it is recommended to carry out these procedures on a small scale and always use proper protective equipment.

**6-(3,5-Dimethyl-1H-pyrazol-1-yl)-[1,2,4]triazolo[4,3-b]-1,2,4,5-tetrazine (2a)** <sup>[s2]</sup> and **3-chloro-6-(3,5-dimethyl-1H-pyrazol-1-yl)-[1,2,4]triazolo[4,3-b]-1,2,4,5-tetrazine (2b)**. A dropping funnel was charged with a solution of  $\text{NaNO}_2$  (5.6 g, 81.2 mmol) in water (20 mL) which was slowly added dropwise to an ice-bath cooled and vigorously stirred solution of **1** (2.0 g, 8.6 mmol) in 6 M HCl (20 mL). After addition, the suspension was heated to  $50\text{ }^\circ\text{C}$  for 2 h. After normal aqueous workup, the residue was applied onto a silica gel column with ethyl acetate (EA): petroleum ether (PE) = 1:3, yielding **2b** and **2a** in 1.44 g (66.4 %) and 226 mg (12.1%), respectively.

**2a**,  $^1\text{H}$  NMR (400 MHz, DMSO-*d*6):  $\delta$  = 10.01 (s, 1H), 6.38 (s, 1H), 2.60 (s, 3H), 2.83 (s, 3H). **2b**,  $^1\text{H}$  NMR (400 MHz, DMSO-*d*6):  $\delta$  = 6.43 (s, 1H), 2.62 (s, 3H), 2.31 (s, 3H); IR (KBr):  $\nu$  3420, 2920, 1531, 1393, 1279, 1105, 1042, 970, 829, 746, 667, 665, 457  $\text{cm}^{-1}$ ; HRMS: calc. for  $\text{C}_8\text{H}_8\text{ClN}_8$  [ $M+\text{H}$ ] $^+$ , 251.0055 found: 251.0053.

**6-(3,5-Dimethyl-1H-pyrazol-1-yl)-3-nitro-[1,2,4]triazolo[4,3-b]-1,2,4,5-tetrazine (2c)**. A dropping funnel was charged with a solution of  $\text{NaNO}_2$  (2.8 g, 40.6 mmol) in water (20 mL) which was added dropwise to an ice-cooled and vigorously stirred solution of **1** (1.0 g, 4.3 mmol) in 65%  $\text{HNO}_3$  (20 mL). After addition, the suspension was heated to  $50\text{ }^\circ\text{C}$  for 2 h. After normal aqueous workup, the residue was applied onto a silica gel column with EA:PE = 1:3, yielding **2c** in 200 mg (17.7 %) and **2a** 88.8 mg (9.5%).

**2c**,  $^1\text{H}$  NMR (400 MHz, DMSO-*d*6):  $\delta$  = 6.43 (s, 1H), 2.62 (s, 3H), 2.31 (s, 3H); IR (KBr):  $\nu$  3447, 3109, 3003, 2934, 2154, 1734, 1584, 1531, 1383, 1281, 1225, 1107, 1078, 1032, 968, 827, 785, 746, 667, 615, 565, 455  $\text{cm}^{-1}$ .

**N-(6-(3,5-Dimethyl-4-nitro-1H-pyrazol-1-yl)-[1,2,4]triazolo-[4,3-b]-1,2,4,5-tetrazin-3-yl)nitramide (2d')**. Conc.  $\text{H}_2\text{SO}_4$  (5 mL) was solved in fuming  $\text{HNO}_3$  (5 mL), followed by the addition of **2a** (1.0 g, 4.6 mmol) at  $0\text{ }^\circ\text{C}$ . The reaction mixture was stirred at room temperature for 19 h. After normal aqueous workup, the residue was applied onto a silica gel column with EA:PE = 1:3, resulting in **2d'** 590 mg (48.8%) as a red solid.  $^1\text{H}$  NMR (400 MHz, DMSO-*d*6):  $\delta$  = 10.23 (s, 1H), 2.90 (s, 3H), 2.59 (s, 3H). IR (KBr):  $\nu$  3433, 3094, 1580, 1541, 1508, 1476, 1412, 1381, 1350, 1321, 1290, 1231, 1163, 1069, 1016, 945, 868, 851, 802, 764, 660, 611, 500, 442  $\text{cm}^{-1}$ .

**N-(6-(3,5-Dimethyl-4-nitro-1H-pyrazol-1-yl)-[1,2,4]triazolo[4,3-b]-1,2,4,5-tetrazin-3-yl)nitramide (2e)**.  $\text{P}_2\text{O}_5$  (2.0 g, 14.1 mmol) was solved in fuming  $\text{HNO}_3$  (10 mL), followed by the addition of **1** (1.0 g, 4.3 mmol) at  $0\text{ }^\circ\text{C}$ . The reaction mixture was stirred at room temperature for 10

h. Then, it was poured into ice water. After normal aqueous workup, the residue was applied to a silica gel column with eluent EA:PE = 1:2, giving **2e** (800 mg, 57.6% yield) as a red solid. <sup>1</sup>H NMR (400 MHz, DMSO-*d*6) δ 10.02 (s, 1H), 3.32 (s, 3H), 2.90 (s, 3H); HRMS [*M*-H]<sup>-</sup> calc. for C<sub>8</sub>H<sub>6</sub>N<sub>11</sub>O<sub>4</sub> 320.0610, found 320.0623; IR (KBr) ν 3094, 2918, 2849, 1742, 1580, 1558, 1508, 1412, 1383, 1358, 1269, 1236, 1065, 1016, 993, 849 cm<sup>-1</sup>.

**[1,2,4]Triazolo[4,3-*b*]-1,2,4,5-tetrazin-6-amine (3a).** [s2] A 100 mL capacity pressure reactor equipped with a magnetic stirrer was charged with **2d'** (1.0 g, 3.8 mmol) and acetonitrile (20 mL). Ammonium hydroxide (25%, 2.0 mL) was introduced into the closed vessel. The reactor was heated to 100 °C for 4 h. When it was cooled to room temperature, the resulting mixture was concentrated under vacuum. The residue was applied onto a silica gel column with eluent EA:PE = 1:2, resulting in **3a** 489 mg (93.1%) as a yellow solid. mp: 224.8 °C; <sup>1</sup>H NMR (400 MHz, DMSO-*d*6): δ = 9.34 (s, 1H), 8.08 (s, 2H); <sup>13</sup>C NMR (100 MHz, DMSO-*d*6): δ = 156.66, 149.81, 136.03; IR (KBr): ν 3308, 3102, 1653, 1558, 1360, 1302, 1153, 1049, 972, 943, 864, 735, 681, 610, 511, 446 cm<sup>-1</sup>.

**3-Chloro-[1,2,4]triazolo[4,3-*b*]-1,2,4,5-tetrazin-6-amine (3b)** Similar procedure of **3a**, **3b** was isolated in 629 mg (83.5%) as a yellow solid from **2b** (1.10 g, 4.4 mmol) with eluent EA:PE = 1:2.5. mp: 227.4 °C; <sup>1</sup>H NMR (400 MHz, DMSO-*d*6): δ = 8.35 (s, 1H); <sup>13</sup>C NMR (100 MHz, DMSO-*d*6): δ = 156.98, 150.40, 133.27. <sup>15</sup>N NMR (70 MHz, DMSO-*d*6): δ = 55.06, 37.85, -55.12, -63.07, -182.21, -301.24; IR (KBr): ν 3433, 3294, 3208, 3161, 1638, 1560, 1387, 1294, 1109, 1063, 735, 675, 529 cm<sup>-1</sup>; GC-MS: calc. for C<sub>3</sub>H<sub>2</sub>N<sub>8</sub>O<sub>2</sub>, 171.0; found: 171.0.

**3-Nitro-[1,2,4]triazolo[4,3-*b*]-1,2,4,5-tetrazin-6-amine (TTNA).** Similar to **3a**, TTNA was obtained in 100 mg (71.7 %) as a yellow solid from **2c** (200 mg, 0.766 mmol) with eluent EA:PE = 1:2.5. <sup>13</sup>C NMR (100 MHz, CD<sub>3</sub>OD): δ = 160.32, 159.27, 150.48. <sup>15</sup>N NMR (70 MHz, DMSO-*d*6): δ = 58.26, 44.94, -35.70, -46.22, -63.40, -177.01, -183.65, -296.59; IR (KBr): ν 3360, 1647, 1541, 1391, 1294, 1115, 1007, 824, 741, 669, 598 cm<sup>-1</sup>; HRMS: calc. for C<sub>3</sub>H<sub>1</sub>N<sub>8</sub>O<sub>2</sub> [*M*-H]<sup>-</sup>. 181.0228 found: 181.0228.

***N*-(6-Amino-[1,2,4]triazolo[4,3-*b*]-1,2,4,5-tetrazin-3-yl)nitramide (TTDAN).** Similar to **3a**, TTDAN was yielded in 570 mg (92.9%) as red solid from **2e** (1.0 g, 3.1 mmol) with eluent MeOH:CH<sub>2</sub>Cl<sub>2</sub> = 1:5. <sup>1</sup>H NMR (400 MHz, DMSO-*d*6): δ = 7.76 (s, 2H); <sup>13</sup>C NMR (100 MHz, DMSO-*d*6): δ = 156.07, 149.24, 148.48; <sup>15</sup>N NMR (70 MHz, DMSO-*d*6): δ = 49.54, 18.58, -12.64, -56.70, -66.04, -152.79, -176.86, -195.33, -306.16; IR (KBr): ν 3566, 3308, 3144, 1636, 1607, 1558, 1516, 1468, 1395, 1333, 1053, 1015, 849, 760, 708, 669, 532, 501 cm<sup>-1</sup>; HRMS: calc. for C<sub>3</sub>H<sub>2</sub>N<sub>9</sub>O<sub>2</sub> [*M*-H]<sup>-</sup>. 196.0337 found: 196.0341.

## 2. Other control experiments and trials

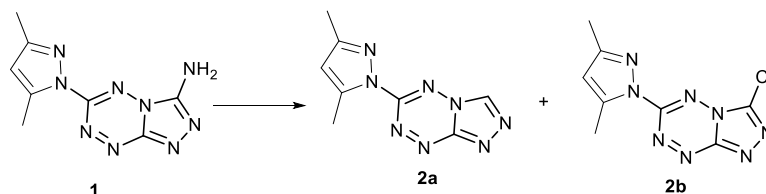

- 1) NaNO<sub>2</sub>, 2M HCl, **2a** (49.2% yield), **2b** (29.7% yield).
- 2) NaNO<sub>2</sub>, 4M HCl, **2a** (39.8% yield), **2b** (42.2% yield).
- 3) NaNO<sub>2</sub>, 6M HCl, **2a** (12.1% yield), **2b** (66.4% yield).

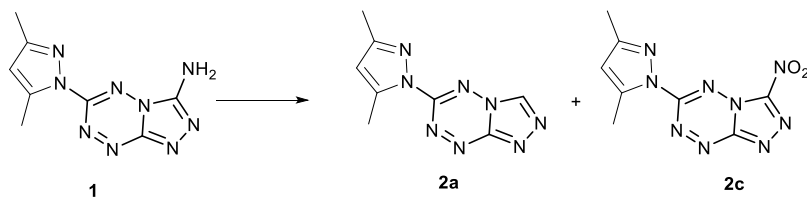

- 1) NaNO<sub>2</sub>, 0.5M H<sub>2</sub>SO<sub>4</sub>, **2a** (0% yield), **2c** (0% yield).
- 2) NaNO<sub>2</sub>, 1M H<sub>2</sub>SO<sub>4</sub>, **2a** (5.6% yield), **2c** (4.3% yield).
- 3) NaNO<sub>2</sub>, 2M H<sub>2</sub>SO<sub>4</sub>, **2a** (13.2% yield), **2c** (10.3% yield).
- 4) NaNO<sub>2</sub>, 4M H<sub>2</sub>SO<sub>4</sub>, **2a** (11.1% yield), **2c** (12.3% yield).
- 5) NaNO<sub>2</sub>, 6M H<sub>2</sub>SO<sub>4</sub>, **2a** (12.4% yield), **2c** (10.1% yield).
- 6) NaNO<sub>2</sub>, 25% HNO<sub>3</sub>, **2a** (13.7% yield), **2c** (10.9% yield).
- 7) NaNO<sub>2</sub>, 65% HNO<sub>3</sub>, **2a** (9.5% yield), **2c** (17.7% yield).

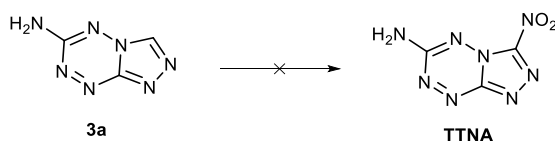

- 1) HNO<sub>3</sub>, H<sub>2</sub>SO<sub>4</sub>, no conversion.

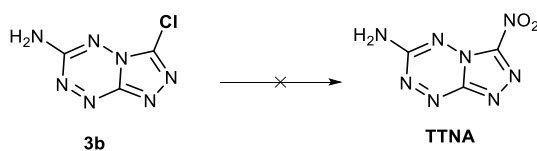

- 1) KNO<sub>2</sub>, CuI, N,N,N',N'-Tetramethylethylenediamine, DMF, no conversion.
- 2) AgNO<sub>2</sub>, THF, no conversion.

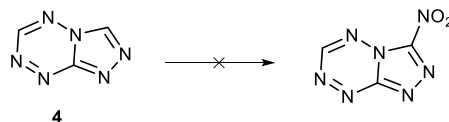

- 1) HNO<sub>3</sub>, H<sub>2</sub>SO<sub>4</sub>, no conversion.

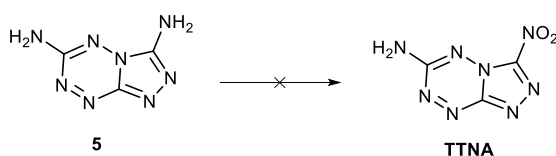

- 1) Na<sub>2</sub>WO<sub>4</sub>, 50% H<sub>2</sub>O<sub>2</sub>, conc. H<sub>2</sub>SO<sub>4</sub>, **TTNA** (0% yield).
- 2) 50% H<sub>2</sub>O<sub>2</sub>, TFA, DCM, no conversion.
- 3) Fuming HNO<sub>3</sub>, P<sub>2</sub>O<sub>5</sub>, **TTNA** (0% yield).
- 4) NaNO<sub>2</sub>, 2 M H<sub>2</sub>SO<sub>4</sub>, **TTNA** (0% yield).

**Scheme S1** Control experiments and others reactions

### 3. X-ray Diffraction

Crystal data of **1** was collected on a Bruker APEX-II CCD diffractometer at 296 K

employing graphite-monochromated MoK $\alpha$  radiation ( $\lambda=0.71073$  Å). The structure was solved by direct methods and refined by the least-squares method on  $F^2$  using the SHELXTL-97 suite of programs.<sup>[S1]</sup> All non-hydrogen atoms were refined anisotropically. Details of the x-ray data collection and structure refinements are summarized in Table S1. Supplementary crystallographic data for this paper can be obtained free of charge from The Cambridge Crystallographic Data Centre via [www.ccdc.cam.ac.uk/data\\_request/cif](http://www.ccdc.cam.ac.uk/data_request/cif) with the CCDC number 1883370 and 1817250.

**Table S1** Crystallographic data for **3b** and **4**.

|                                                           | <b>3b</b>                                                       | <b>4</b>                                                        |
|-----------------------------------------------------------|-----------------------------------------------------------------|-----------------------------------------------------------------|
| Formula                                                   | C3H2ClN7                                                        | C3 H2 N6                                                        |
| Mw[g mol <sup>-1</sup> ]                                  | 171.57                                                          | 122.11                                                          |
| T[K]                                                      | 296(2) K                                                        | 296(2)                                                          |
| Crystal size[mm <sup>3</sup> ]                            | 0.150 x 0.130 x<br>0.100                                        | 0.150 x 0.120 x<br>0.100                                        |
| Crystal system                                            | Orthorhombic                                                    | Orthorhombic                                                    |
| Space group                                               | <i>P n m a</i>                                                  | <i>P 21 21 21</i>                                               |
| <i>a</i> [Å]                                              | 7.5145(11)                                                      | 5.4334(7)                                                       |
| <i>b</i> [Å]                                              | 6.2774(9)                                                       | 6.5582(9)                                                       |
| <i>c</i> [Å]                                              | 13.7315(19)                                                     | 13.8317(19)                                                     |
| $\alpha$ [°]                                              | 90                                                              | 90                                                              |
| $\beta$ [°]                                               | 90                                                              | 90                                                              |
| $\gamma$ [°]                                              | 90                                                              | 90                                                              |
| <i>V</i> [Å <sup>3</sup> ]                                | 647.74(16)                                                      | 492.87(11)                                                      |
| <i>Z</i>                                                  | 4                                                               | 4                                                               |
| $\rho_{\text{calc}}$ [g cm <sup>-3</sup> ]                | 1.759                                                           | 1.646                                                           |
| $\mu$ [mm <sup>-1</sup> ]                                 | 0.525                                                           | 0.124                                                           |
| <i>F</i> [000]                                            | 344                                                             | 248                                                             |
| $\vartheta$ range[°]                                      | 2.967 to 28.289                                                 | 2.945-25.046                                                    |
| Reflections collected                                     | 7415 / 869                                                      | 4153 / 872                                                      |
| Index ranges                                              | -9<= <i>h</i> <=9,<br>-8<= <i>k</i> <=8,<br>-18<= <i>l</i> <=18 | -6<= <i>h</i> <=6,<br>-7<= <i>k</i> <=7,<br>-16<= <i>l</i> <=16 |
| <i>R</i> <sub>int</sub>                                   | 0.0176                                                          | 0.0195                                                          |
| Data/restraints/parameters                                | 869 / 0 / 67                                                    | 872 / 1 / 83                                                    |
| Final <i>R</i> index[ <i>I</i> > 2 $\sigma$ ( <i>I</i> )] | <i>R</i> 1 = 0.0295,<br><i>wR</i> 2 = 0.0897                    | <i>R</i> 1 = 0.0886, <i>wR</i> 2 = 0.2403                       |
| Final <i>R</i> index[all data]                            | <i>R</i> 1 = 0.0312, <i>wR</i> 2 = 0.0919                       | <i>R</i> 1 = 0.0916, <i>wR</i> 2 = 0.2426                       |
| GOF on <i>F</i> <sup>2</sup>                              | 1.027                                                           | 0.995                                                           |
| CCDC                                                      | 1883370                                                         | 1817250                                                         |

$$R_1 = \sum \|F_o\| - |F_c| / \sum |F_o|, wR_2 = [(w(F_o^2 - F_c^2)^2) / w(F_o^2)^2]^{1/2}.$$

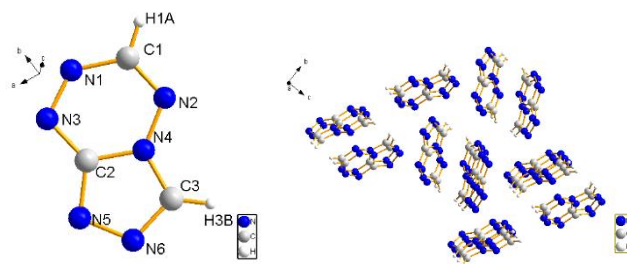

**Figure S1.** (left) Single-crystal X-ray structure of compound **4**. (right) Crystal packing diagram of compound **4**.

Suitable crystals for **4** was obtained by slowly evaporation of solutions of ethyl acetate/petroleum at room temperature and ambient pressure. The single crystal X-ray structures are shown in **Figure S1**. The crystal forms in the  $P2_12_12_1$  space group and the orthorhombic crystal system. The crystal density of **4** is  $1.646 \text{ g cm}^{-3}$  at 278 K. As expected, the 1,2,4-triazole ring and the 1,2,3,4-tetrazine ring are coplanar( $\text{N}(2)\text{-N}(4)\text{-C}(2)\text{-N}(5)$   $-179.1(7)^\circ$ ).

Table S2. Atomic coordinates ( $\times 10^4$ ) and equivalent isotropic displacement parameters ( $\text{\AA}^2 \times 10^3$ ) for **3b**.

U(eq) is defined as one third of the trace of the orthogonalized Uij tensor.

|       | x       | y    | z        | U(eq) |
|-------|---------|------|----------|-------|
| Cl(1) | 2712(1) | 2500 | -2191(1) | 46(1) |
| N(6)  | 2840(2) | 2500 | -240(1)  | 30(1) |
| N(5)  | 1052(2) | 2500 | -55(1)   | 34(1) |
| N(2)  | 5466(2) | 2500 | -939(1)  | 43(1) |
| N(4)  | 2059(2) | 2500 | 1642(1)  | 42(1) |
| N(1)  | 5733(2) | 2500 | 45(1)    | 45(1) |
| N(7)  | -897(2) | 2500 | 1234(1)  | 48(1) |
| N(3)  | 3707(2) | 2500 | 1419(1)  | 43(1) |
| C(3)  | 758(2)  | 2500 | 892(1)   | 35(1) |
| C(1)  | 3721(2) | 2500 | -1100(1) | 35(1) |
| C(2)  | 4129(2) | 2500 | 451(1)   | 35(1) |

Table S3. Bond lengths [ $\text{\AA}$ ] and angles [deg] for **3b**.

|                |            |
|----------------|------------|
| Cl(1)-C(1)     | 1.6786(17) |
| N(6)-C(2)      | 1.3561(18) |
| N(6)-C(1)      | 1.354(2)   |
| N(6)-N(5)      | 1.3674(17) |
| N(5)-C(3)      | 1.319(2)   |
| N(2)-C(1)      | 1.330(2)   |
| N(2)-N(1)      | 1.365(2)   |
| N(4)-N(3)      | 1.276(2)   |
| N(4)-C(3)      | 1.420(2)   |
| N(1)-C(2)      | 1.328(2)   |
| N(7)-C(3)      | 1.330(2)   |
| N(7)-H(7A)     | 0.8600     |
| N(7)-H(7B)     | 0.8600     |
| N(3)-C(2)      | 1.367(2)   |
| C(2)-N(6)-C(1) | 105.13(13) |
| C(2)-N(6)-N(5) | 124.89(13) |
| C(1)-N(6)-N(5) | 129.98(13) |
| C(3)-N(5)-N(6) | 110.34(13) |

|                  |            |
|------------------|------------|
| C(1)-N(2)-N(1)   | 108.03(14) |
| N(3)-N(4)-C(3)   | 119.64(14) |
| C(2)-N(1)-N(2)   | 106.39(14) |
| C(3)-N(7)-H(7A)  | 120.0      |
| C(3)-N(7)-H(7B)  | 120.0      |
| H(7A)-N(7)-H(7B) | 120.0      |
| N(4)-N(3)-C(2)   | 117.28(14) |
| N(5)-C(3)-N(7)   | 120.35(15) |
| N(5)-C(3)-N(4)   | 126.85(15) |
| N(7)-C(3)-N(4)   | 112.80(14) |
| N(2)-C(1)-N(6)   | 109.68(14) |
| N(2)-C(1)-Cl(1)  | 126.44(13) |
| N(6)-C(1)-Cl(1)  | 123.88(13) |
| N(1)-C(2)-N(6)   | 110.77(15) |
| N(1)-C(2)-N(3)   | 128.23(15) |
| N(6)-C(2)-N(3)   | 121.00(15) |

---

Symmetry transformations used to generate equivalent atoms:

Table S4. Anisotropic displacement parameters ( $\text{\AA}^2 \times 10^3$ ) for **3b**.

The anisotropic displacement factor exponent takes the form:

$$-2 \pi^2 [ h^2 a^{*2} U_{11} + \dots + 2 h k a^* b^* U_{12} ]$$

---

|       | U11   | U22   | U33   | U23 | U13    | U12 |
|-------|-------|-------|-------|-----|--------|-----|
| Cl(1) | 52(1) | 61(1) | 26(1) | 0   | 1(1)   | 0   |
| N(6)  | 29(1) | 36(1) | 26(1) | 0   | -2(1)  | 0   |
| N(5)  | 29(1) | 47(1) | 27(1) | 0   | 0(1)   | 0   |
| N(2)  | 36(1) | 50(1) | 44(1) | 0   | 6(1)   | 0   |
| N(4)  | 50(1) | 52(1) | 25(1) | 0   | -2(1)  | 0   |
| N(1)  | 34(1) | 55(1) | 46(1) | 0   | -3(1)  | 0   |
| N(7)  | 41(1) | 70(1) | 33(1) | 0   | 9(1)   | 0   |
| N(3)  | 46(1) | 53(1) | 31(1) | 0   | -11(1) | 0   |
| C(3)  | 38(1) | 39(1) | 28(1) | 0   | 1(1)   | 0   |
| C(1)  | 34(1) | 40(1) | 31(1) | 0   | 4(1)   | 0   |
| C(2)  | 33(1) | 42(1) | 32(1) | 0   | -7(1)  | 0   |

---



Table S5. Hydrogen coordinates ( $\times 10^4$ ) and isotropic displacement parameters ( $\text{\AA}^2 \times 10^3$ ) for **3b**.

|       | x     | y    | z    | U(eq) |
|-------|-------|------|------|-------|
| H(7A) | -1783 | 2500 | 838  | 58    |
| H(7B) | -1082 | 2500 | 1852 | 58    |

Table S6. Atomic coordinates ( $\times 10^4$ ) and equivalent isotropic displacement parameters ( $\text{\AA}^2 \times 10^3$ ) for **4**.

U(eq) is defined as one third of the trace of the orthogonalized  $U_{ij}$  tensor.

|      | x         | y         | z       | U(eq) |
|------|-----------|-----------|---------|-------|
| N(1) | 1046(17)  | 10859(12) | 9361(6) | 58(2) |
| N(2) | -1652(13) | 8127(11)  | 9388(5) | 42(2) |
| N(3) | 2702(13)  | 10117(11) | 8780(5) | 41(2) |
| N(4) | 0(14)     | 7239(12)  | 8785(5) | 48(2) |
| N(5) | 3296(18)  | 6917(13)  | 7886(6) | 62(2) |
| N(6) | 1901(16)  | 5233(11)  | 7827(5) | 52(2) |
| C(1) | -1101(14) | 9957(12)  | 9670(5) | 34(2) |
| C(2) | 2097(12)  | 8210(10)  | 8488(4) | 24(1) |
| C(3) | -84(16)   | 5415(11)  | 8376(5) | 33(2) |

Table S7. Bond lengths [ $\text{\AA}$ ] and angles [deg] for **4**.

|           |           |
|-----------|-----------|
| N(1)-N(3) | 1.300(11) |
| N(1)-C(1) | 1.376(12) |
| N(2)-C(1) | 1.297(10) |
| N(2)-N(4) | 1.357(10) |
| N(3)-C(2) | 1.355(10) |
| N(4)-C(3) | 1.324(10) |
| N(4)-C(2) | 1.369(10) |
| N(5)-C(2) | 1.356(10) |
| N(5)-N(6) | 1.342(12) |

|                 |           |
|-----------------|-----------|
| N(6)-C(3)       | 1.324(12) |
| C(1)-H(1A)      | 0.9300    |
| C(3)-H(3B)      | 0.9300    |
| N(3)-N(1)-C(1)  | 128.1(8)  |
| C(1)-N(2)-N(4)  | 115.4(7)  |
| N(1)-N(3)-C(2)  | 111.2(7)  |
| C(3)-N(4)-N(2)  | 128.9(7)  |
| C(3)-N(4)-C(2)  | 108.7(7)  |
| N(2)-N(4)-C(2)  | 122.4(7)  |
| C(2)-N(5)-N(6)  | 106.3(8)  |
| C(3)-N(6)-N(5)  | 110.6(7)  |
| N(2)-C(1)-N(1)  | 120.0(7)  |
| N(2)-C(1)-H(1A) | 120.0     |
| N(1)-C(1)-H(1A) | 120.0     |
| N(3)-C(2)-N(5)  | 130.1(7)  |
| N(3)-C(2)-N(4)  | 122.8(7)  |
| N(5)-C(2)-N(4)  | 107.0(7)  |
| N(6)-C(3)-N(4)  | 107.4(7)  |
| N(6)-C(3)-H(3B) | 126.3     |
| N(4)-C(3)-H(3B) | 126.3     |

---

Symmetry transformations used to generate equivalent atoms:

Table S8. Anisotropic displacement parameters ( $\text{\AA}^2 \times 10^3$ ) for **4**.

The anisotropic displacement factor exponent takes the form:

$$-2 \pi^2 [ h^2 a^{*2} U_{11} + \dots + 2 h k a^* b^* U_{12} ]$$

---

|      | U11   | U22   | U33   | U23    | U13   | U12   |
|------|-------|-------|-------|--------|-------|-------|
| N(1) | 70(5) | 47(5) | 56(4) | -5(4)  | -4(4) | 7(4)  |
| N(2) | 45(4) | 44(4) | 36(3) | -1(3)  | 6(3)  | 1(3)  |
| N(3) | 47(4) | 33(3) | 42(3) | 1(3)   | -1(3) | 1(3)  |
| N(4) | 46(4) | 51(5) | 46(4) | 10(3)  | -8(4) | -5(4) |
| N(5) | 75(6) | 64(5) | 48(4) | -7(4)  | -4(4) | 15(5) |
| N(6) | 68(5) | 36(4) | 51(4) | -12(3) | -6(4) | 2(4)  |
| C(1) | 38(4) | 28(4) | 35(3) | -2(3)  | 6(3)  | 7(3)  |
| C(2) | 28(3) | 21(3) | 22(3) | 0(3)   | -1(3) | -3(3) |
| C(3) | 39(4) | 22(4) | 37(4) | -4(3)  | -4(3) | -2(3) |

---

Table S9. Hydrogen coordinates ( $\times 10^4$ ) and isotropic displacement parameters ( $\text{\AA}^2 \times 10^3$ ) for **4**.

|       | x     | y     | z     | U(eq) |
|-------|-------|-------|-------|-------|
| H(1A) | -2157 | 10660 | 10081 | 40    |
| H(3B) | -1311 | 4442  | 8458  | 39    |

Table S10. Torsion angles [deg] for **4**.

|                     |           |
|---------------------|-----------|
| C(1)-N(1)-N(3)-C(2) | -0.6(12)  |
| C(1)-N(2)-N(4)-C(3) | -179.1(7) |
| C(1)-N(2)-N(4)-C(2) | -0.4(10)  |
| C(2)-N(5)-N(6)-C(3) | -0.9(9)   |
| N(4)-N(2)-C(1)-N(1) | -0.4(11)  |
| N(3)-N(1)-C(1)-N(2) | 1.0(13)   |
| N(1)-N(3)-C(2)-N(5) | 179.6(8)  |
| N(1)-N(3)-C(2)-N(4) | -0.2(10)  |
| N(6)-N(5)-C(2)-N(3) | -179.2(7) |
| N(6)-N(5)-C(2)-N(4) | 0.6(8)    |
| C(3)-N(4)-C(2)-N(3) | 179.7(7)  |
| N(2)-N(4)-C(2)-N(3) | 0.8(11)   |
| C(3)-N(4)-C(2)-N(5) | -0.2(8)   |
| N(2)-N(4)-C(2)-N(5) | -179.1(7) |
| N(5)-N(6)-C(3)-N(4) | 0.8(9)    |
| N(2)-N(4)-C(3)-N(6) | 178.4(7)  |
| C(2)-N(4)-C(3)-N(6) | -0.4(8)   |

Symmetry transformations used to generate equivalent atoms:

Table S11. Hydrogen bonds for **4** [A and deg.].

| D-H...A | d(D-H) | d(H...A) | d(D...A) | <(DHA) |
|---------|--------|----------|----------|--------|
|---------|--------|----------|----------|--------|

## 4. Computation details

Computations were performed by using the Gaussian09 (Revision B.01) suite of programs. The geometric optimization of molecules and frequency analysis were accomplished by using B3LYP with the 6-31+G\*\* basis set.

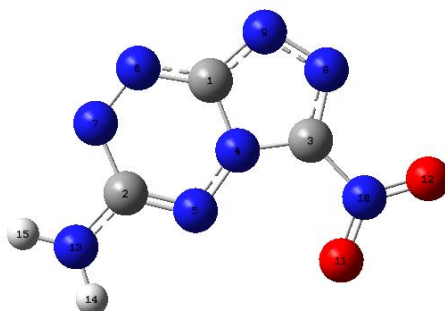

*Figure S2.* The optimized structure of TTNA at B3LYP/6-31+G\*\* level.

*Table S12.* Cartesian coordinates of the optimized structure TTNA.

|                 | X          | Y          | Z          |
|-----------------|------------|------------|------------|
| C <sub>1</sub>  | -0.5362463 | 1.3661841  | -0.0000075 |
| C <sub>2</sub>  | -2.1010154 | -0.7111967 | -0.0000248 |
| C <sub>3</sub>  | 1.3119545  | 0.2583627  | 0.0000183  |
| N <sub>4</sub>  | -0.0353665 | 0.0753662  | -0.0000062 |
| N <sub>5</sub>  | -0.8143429 | -1.0289341 | -0.0000085 |
| N <sub>6</sub>  | -1.8695325 | 1.5954162  | -0.0000196 |
| N <sub>7</sub>  | -2.6561670 | 0.5788729  | -0.0000268 |
| N <sub>8</sub>  | 1.6026685  | 1.5620466  | 0.0000165  |
| N <sub>9</sub>  | 0.4635272  | 2.2590948  | 0.0000053  |
| N <sub>10</sub> | 2.3030458  | -0.7946138 | 0.0000261  |
| O <sub>11</sub> | 1.8754143  | -1.9507533 | -0.0000704 |
| O <sub>12</sub> | 3.4784235  | -0.4498042 | 0.0000962  |
| N <sub>13</sub> | -3.0165348 | -1.6980910 | -0.0000101 |
| H <sub>14</sub> | -2.7248227 | -2.6631221 | 0.0000243  |
| H <sub>15</sub> | -3.9951212 | -3.9951212 | 0.0000164  |

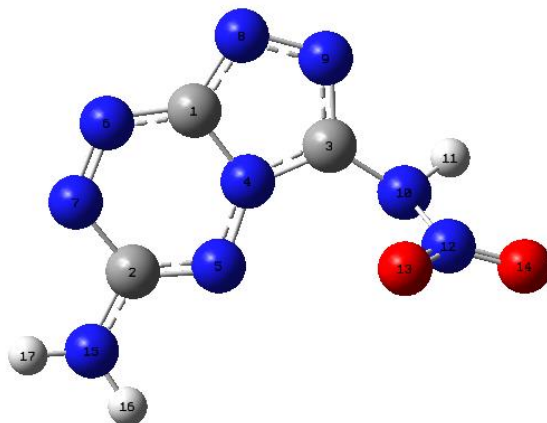

Figure S3. The optimized structure of TTDAN at B3LYP/6-31+G\*\* level.

Table S13. Cartesian coordinates of the optimized structure TTDAN.

|                 | X          | Y          | Z          |
|-----------------|------------|------------|------------|
| C <sub>1</sub>  | -1.1583629 | 1.3396050  | 0.1275614  |
| C <sub>2</sub>  | -2.0841269 | -1.0847725 | -0.1244842 |
| C <sub>3</sub>  | 0.8824660  | 0.8104300  | -0.3587898 |
| N <sub>4</sub>  | -0.3523778 | 0.2733229  | -0.2281939 |
| N <sub>5</sub>  | -0.7904175 | -0.9973832 | -0.3786502 |
| N <sub>6</sub>  | -2.4760048 | 1.1519693  | 0.3746239  |
| N <sub>7</sub>  | -2.9454993 | -0.0393489 | 0.2584591  |
| N <sub>8</sub>  | -0.4412000 | 2.4668078  | 0.1764160  |
| N <sub>9</sub>  | 0.8244374  | 2.1273122  | -0.1184212 |
| N <sub>10</sub> | 2.0093203  | 0.1067356  | -0.7642077 |
| H <sub>11</sub> | 2.7015302  | 0.6270256  | -1.2950512 |
| N <sub>12</sub> | 2.6731186  | -0.6987467 | 0.2068178  |
| O <sub>13</sub> | 2.0181689  | -1.0394365 | 1.1779285  |
| O <sub>14</sub> | 3.8213313  | -1.0043496 | -0.0766871 |
| N <sub>15</sub> | -2.7055196 | -2.2774088 | -0.2458149 |
| H <sub>16</sub> | -2.1631882 | -3.1126215 | -0.4023932 |
| H <sub>17</sub> | -3.6652023 | -2.3485123 | 0.0545877  |

The heats of formation of the [1,2,4]triazolo[4,3-*b*][1,2,4,5]tetrazine derivatives were computed by using the Gaussian09 (Revision B.01) suite of programs based on isodesmic reactions (Scheme S2) at the MP2 level of theory.

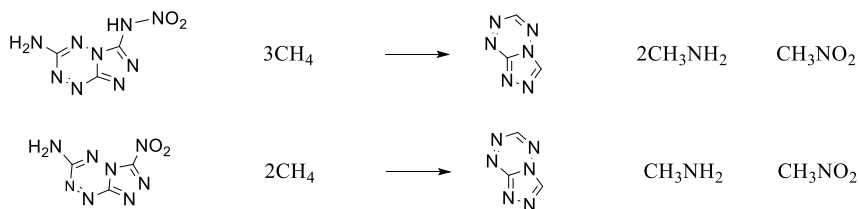

Scheme S2 Isodesmic reactions for [1,2,4]Triazolo[4,3-*b*][1,2,4,5]tetrazine derivatives

**Table S14.** Calculated (B3LYP/6-31+G\*\*//MP2/6-311++G\*\*) total energy ( $E_0$ ), Zero-Point Energy (ZPE), values of thermal correction ( $H_T$ ), and heats of formation (HOF) of **TTDAN** and **TTNA**.

| Name                                     | $E_0$ (a.u.) | ZPE (a.u.) | $H_T$ (a.u.) | HOF ( $\text{kJ}\cdot\text{mol}^{-1}$ ) |
|------------------------------------------|--------------|------------|--------------|-----------------------------------------|
| <b>TTDAN</b>                             | -757.6795337 | 0.104436   | 0.116348     | 634.3                                   |
| <b>TTNA</b>                              | -702.4348669 | 0.086908   | 0.097864     | 656.8                                   |
| [1,2,4]triazolo[4,3-b][1,2,4,5]tetrazine | -443.027497  | 0.068714   | 0.07522      | 667.5 <sup>a</sup>                      |
| $\text{CH}_3\text{NO}_2$                 | -244.5543604 | 0.049856   | 0.055129     | -80.8 <sup>b</sup>                      |
| $\text{CH}_3\text{NH}_2$                 | -95.6318757  | 0.064027   | 0.068396     | -22.5 <sup>b</sup>                      |
| $\text{CH}_4$                            | -40.3984876  | 0.044793   | 0.048605     | -74.6 <sup>b</sup>                      |
| $\text{NH}_3\text{NO}_2$                 | -260.554147  | 0.038261   | 0.042605     | -3.9 <sup>b</sup>                       |

<sup>a</sup> T. Wei, W. Zhu, J. Zhang, H. Xiao, *J. Hazardous Mat.*, **2010**, 179, 581–590; <sup>b</sup> D. R. Lide, Handbook of Chemistry and Physics (Section 5), 84th ed.; CRC Press: Boca Raton, FL, 2003–2004.

## 5. Spectroscopy

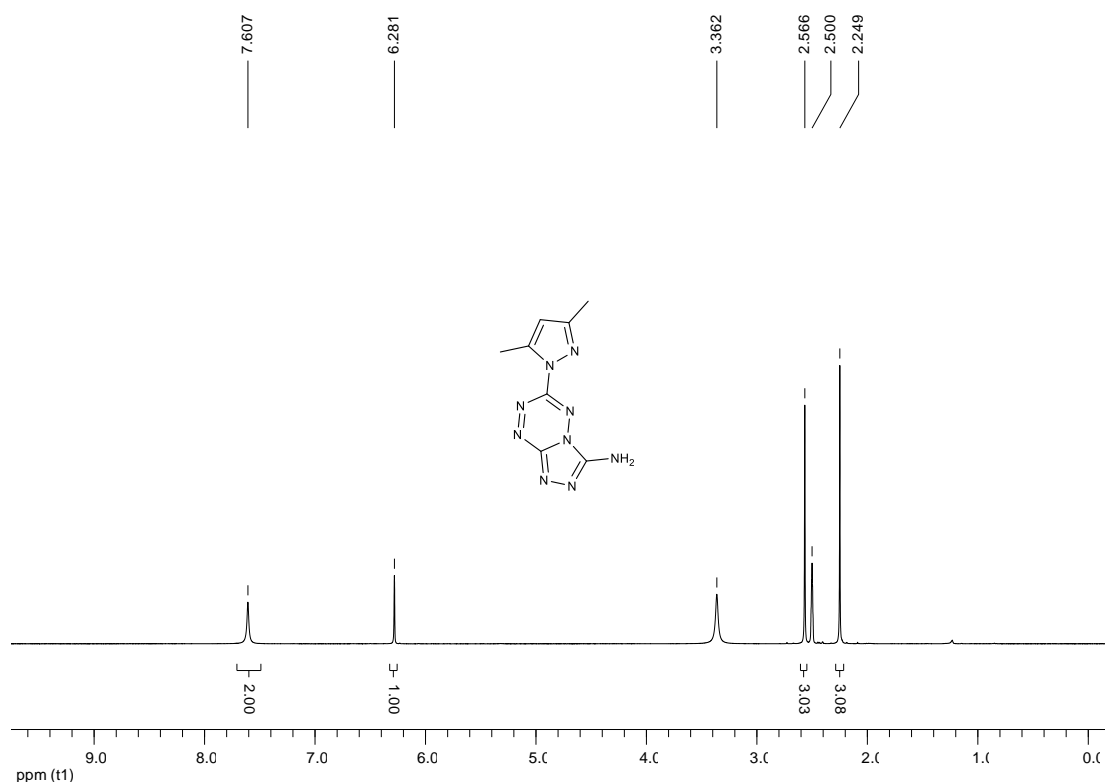

**Figure S4** <sup>1</sup>H NMR spectra of **1**. [S2]

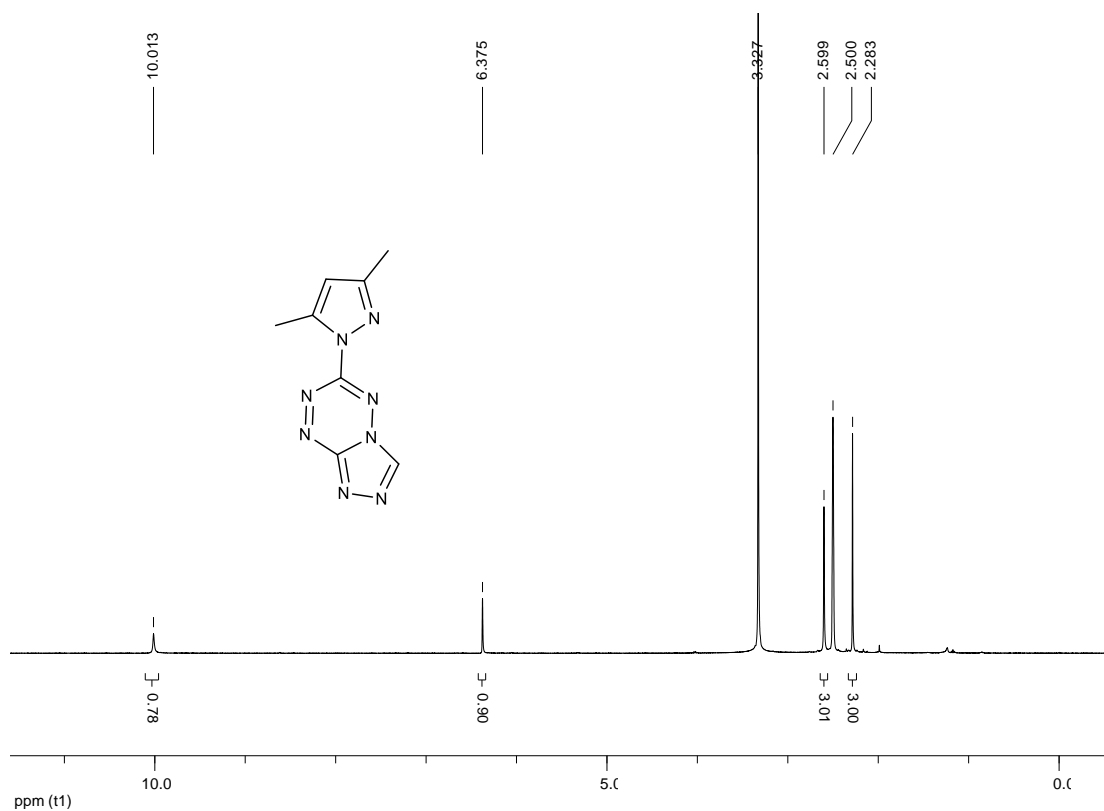

Figure S5  $^1\text{H}$  NMR spectra of **2a**.<sup>[S2]</sup>

WGL-518 #313 RT: 3.09 AV: 1 NL: 3.10E9  
T: FTMS + p ESI Full ms [100.00-1500.00]

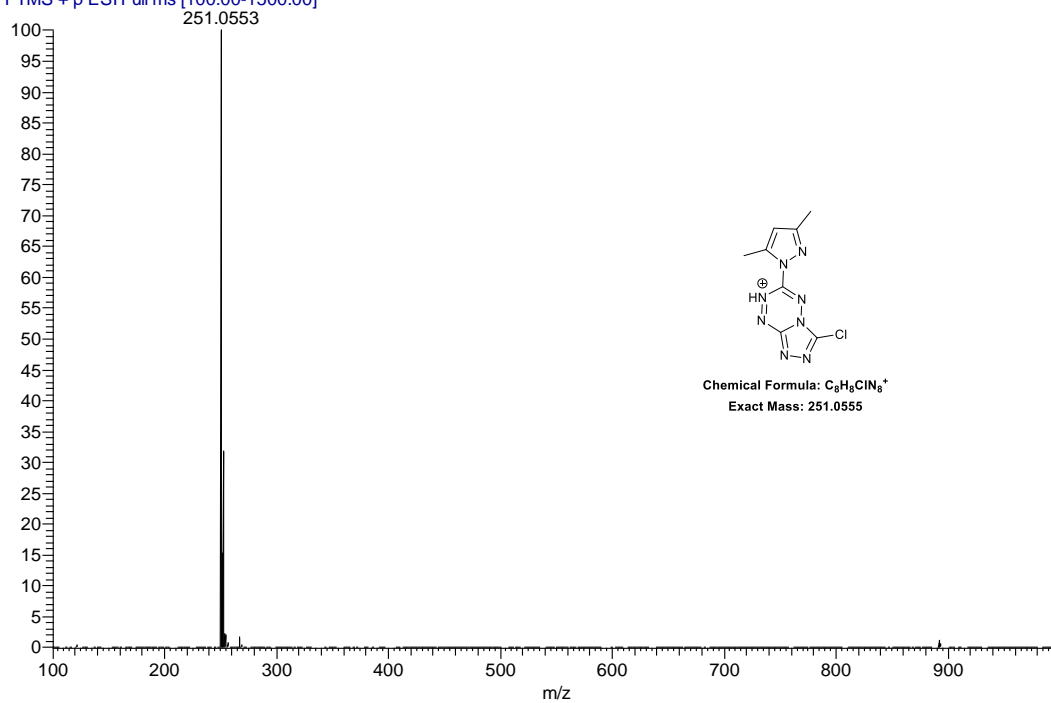

Figure S6 ESI-MS of **2b**.

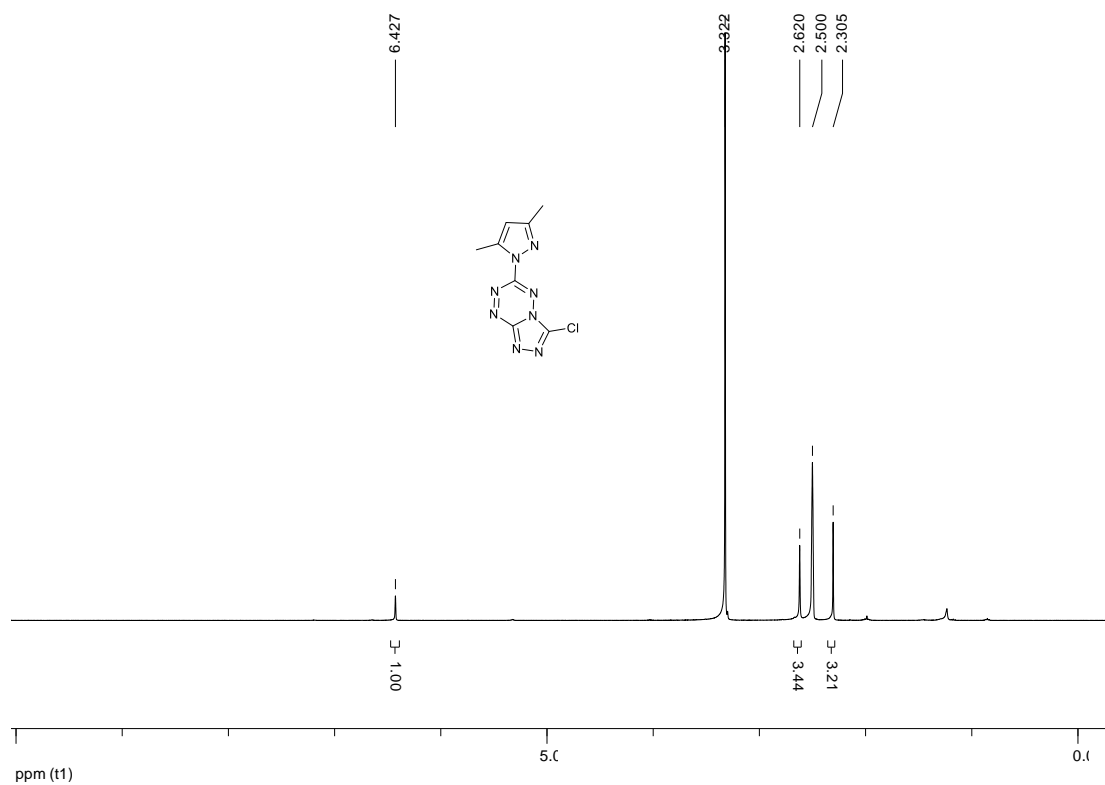

Figure S7 <sup>1</sup>H NMR spectra of 2b.

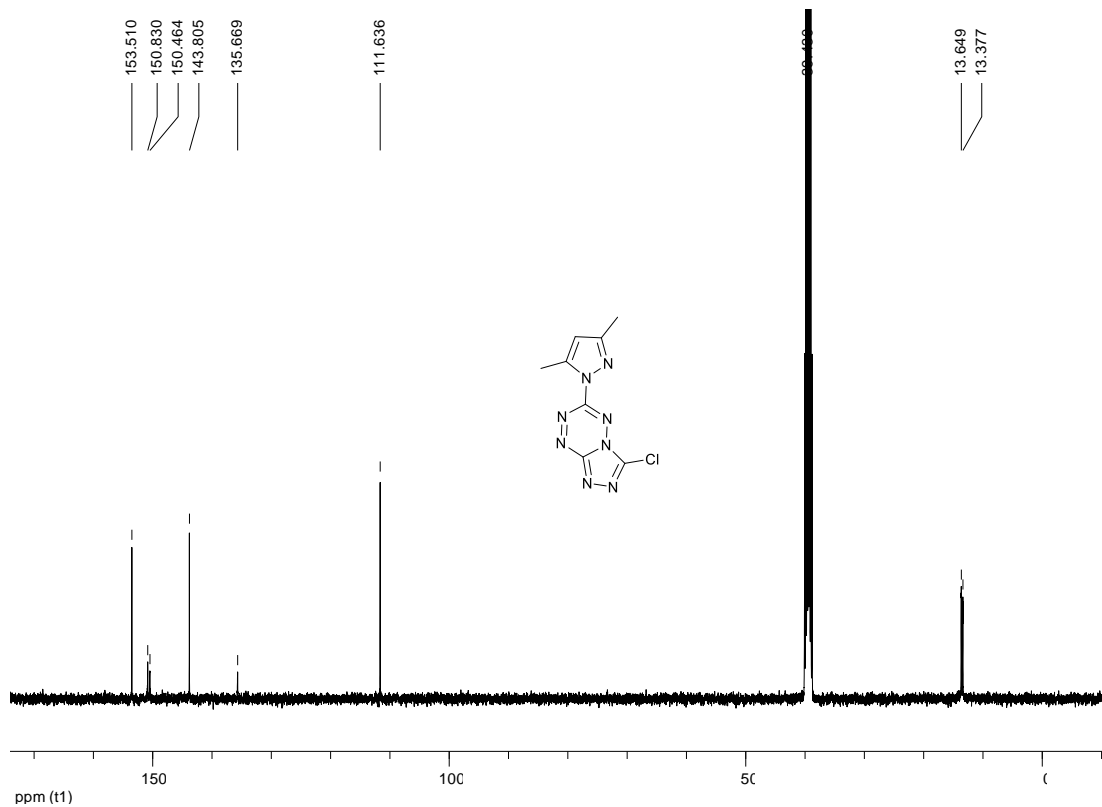

Figure S8 <sup>13</sup>C NMR of 2b.



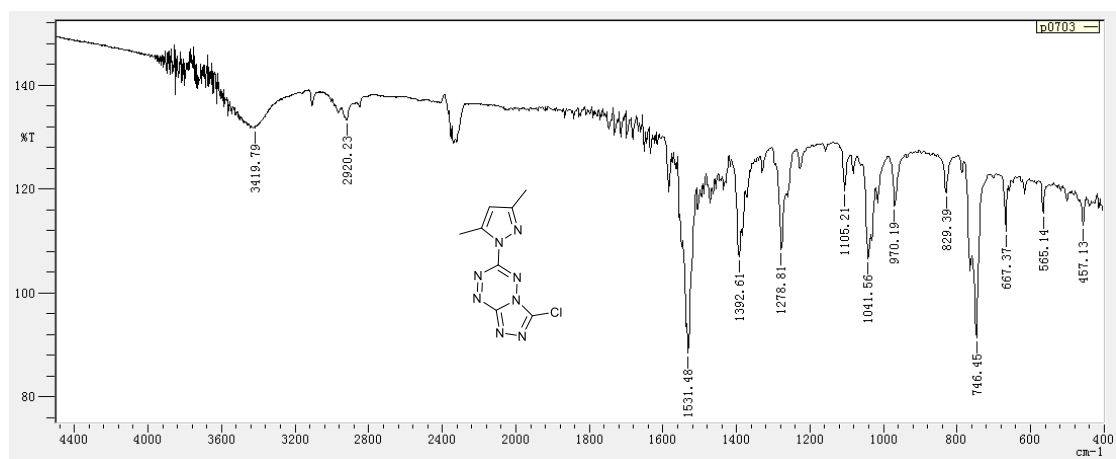

Figure S9 IR of 2b

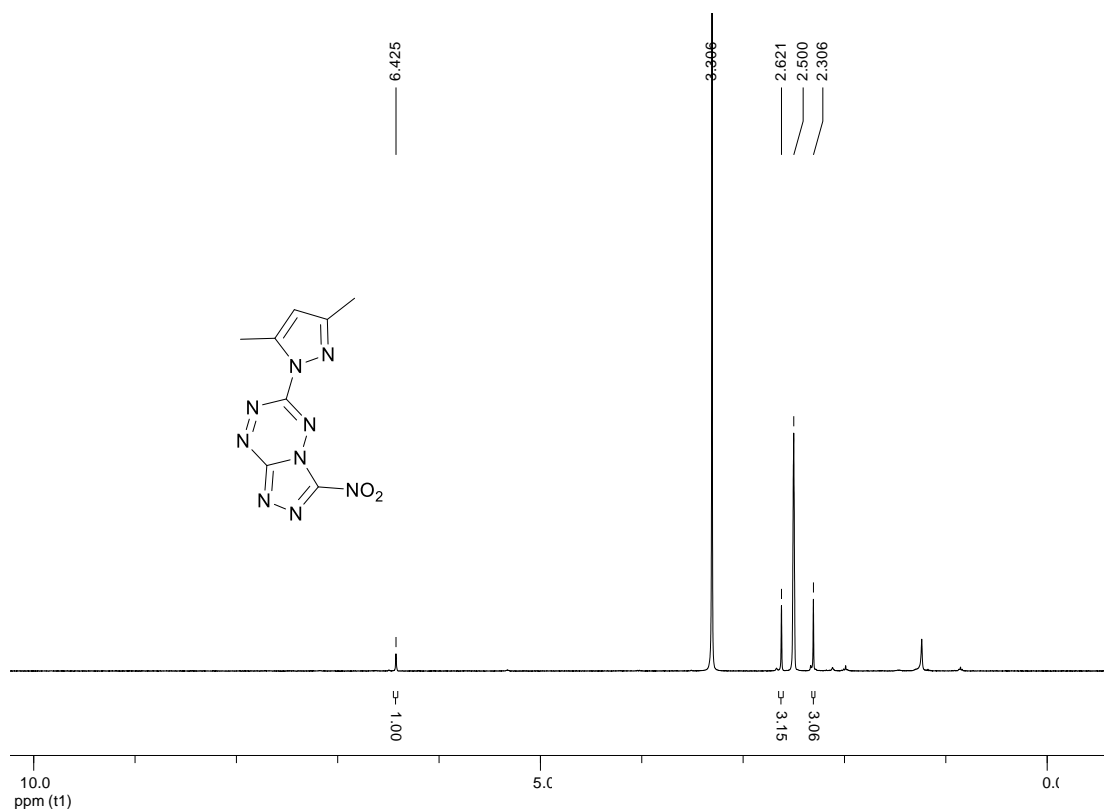

Figure S10 <sup>1</sup>H NMR of 2c.

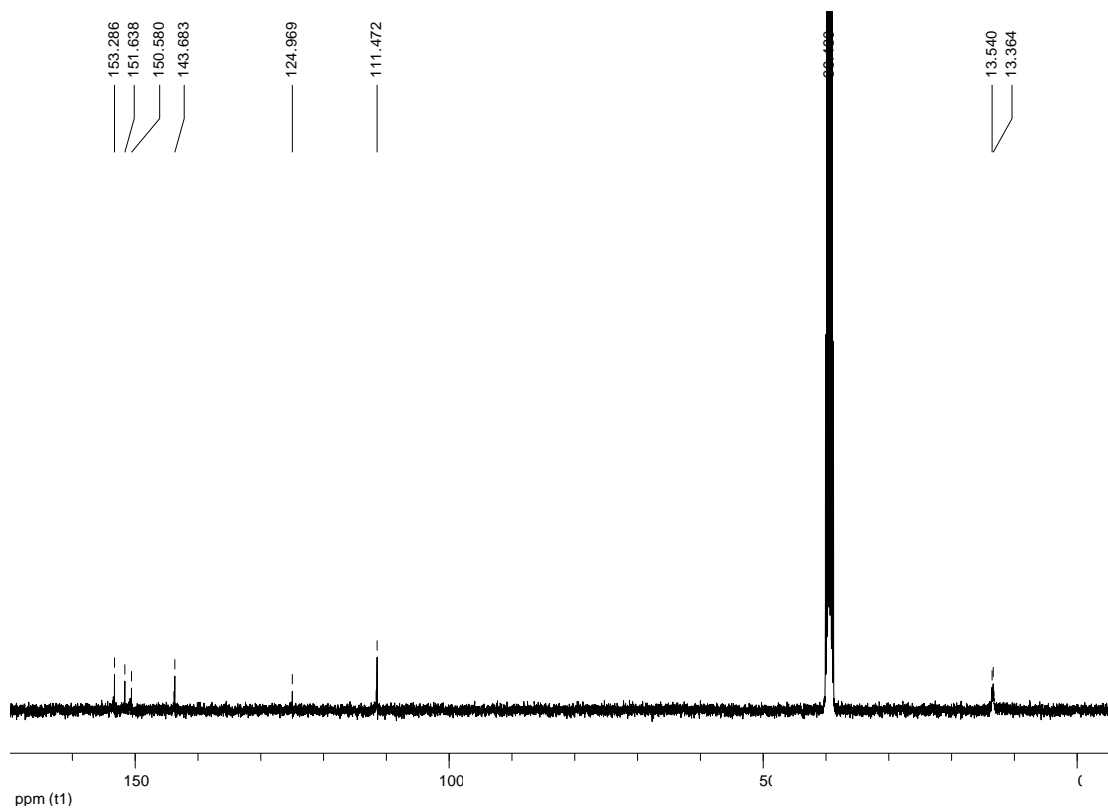

Figure S11  $^{13}\text{C}$  NMR of 2c.

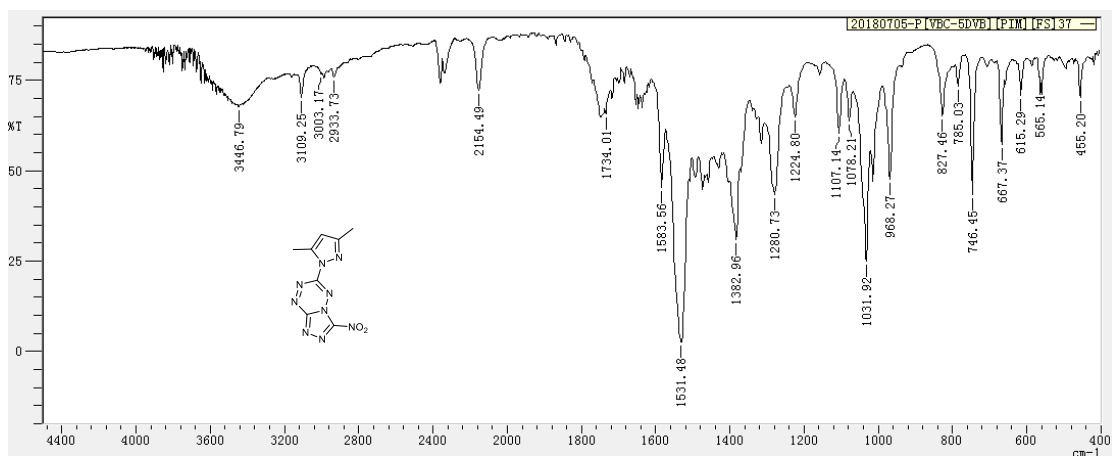

Figure S12 IR of 2c.

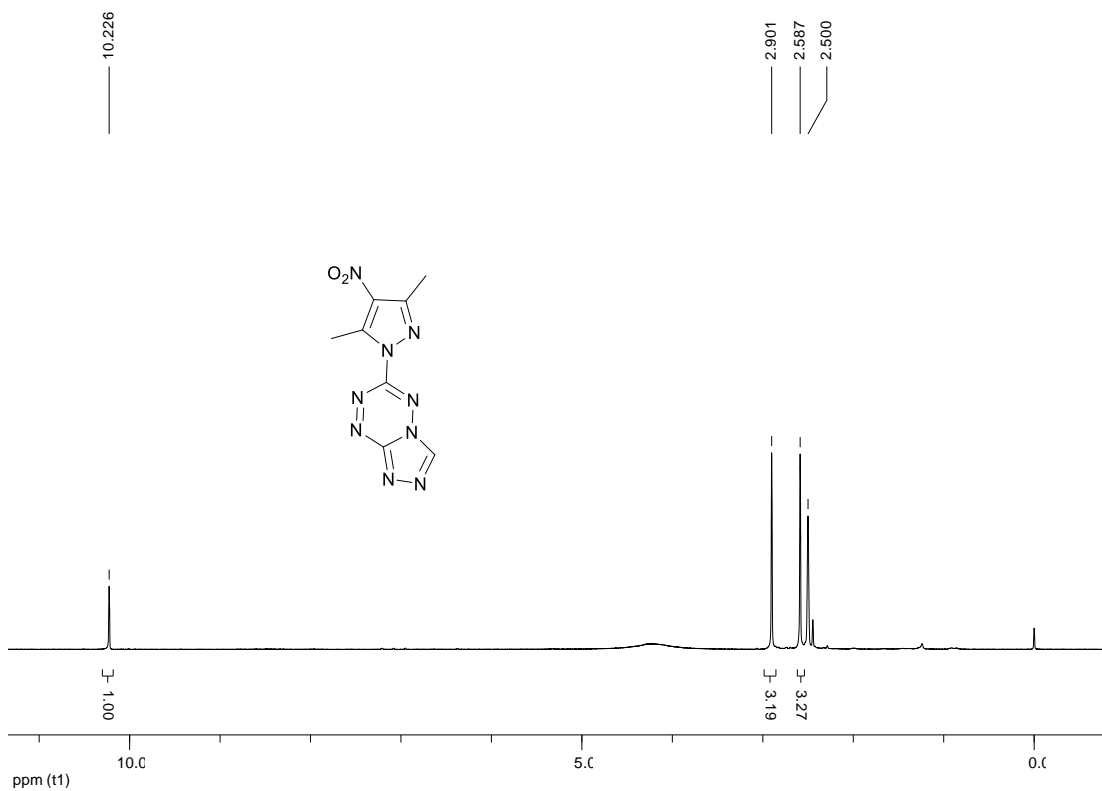

Figure S13 <sup>1</sup>H NMR of 2d.

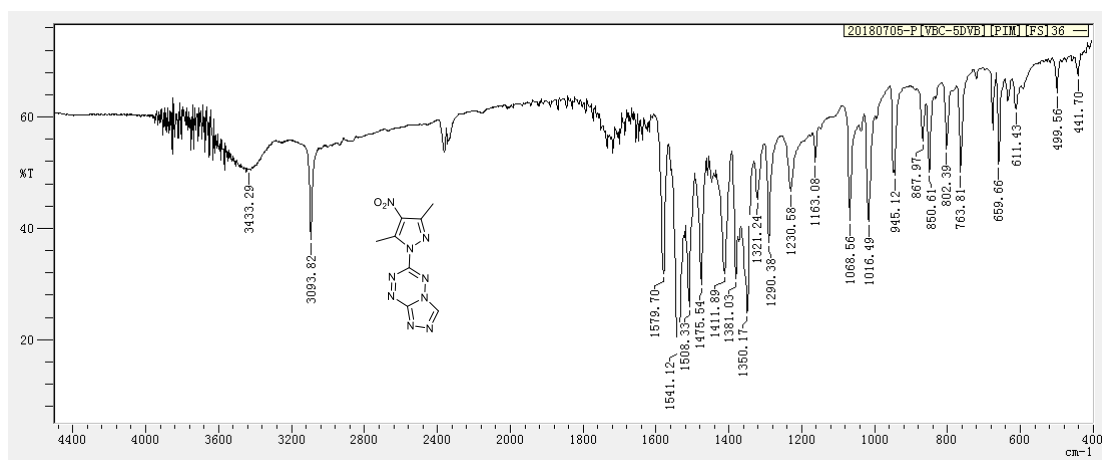

Figure S14 IR of 2d.

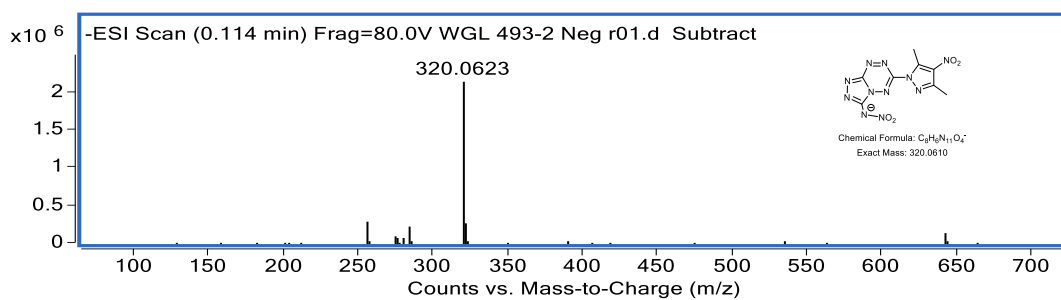

Figure S15 ESI-MS of 2e.

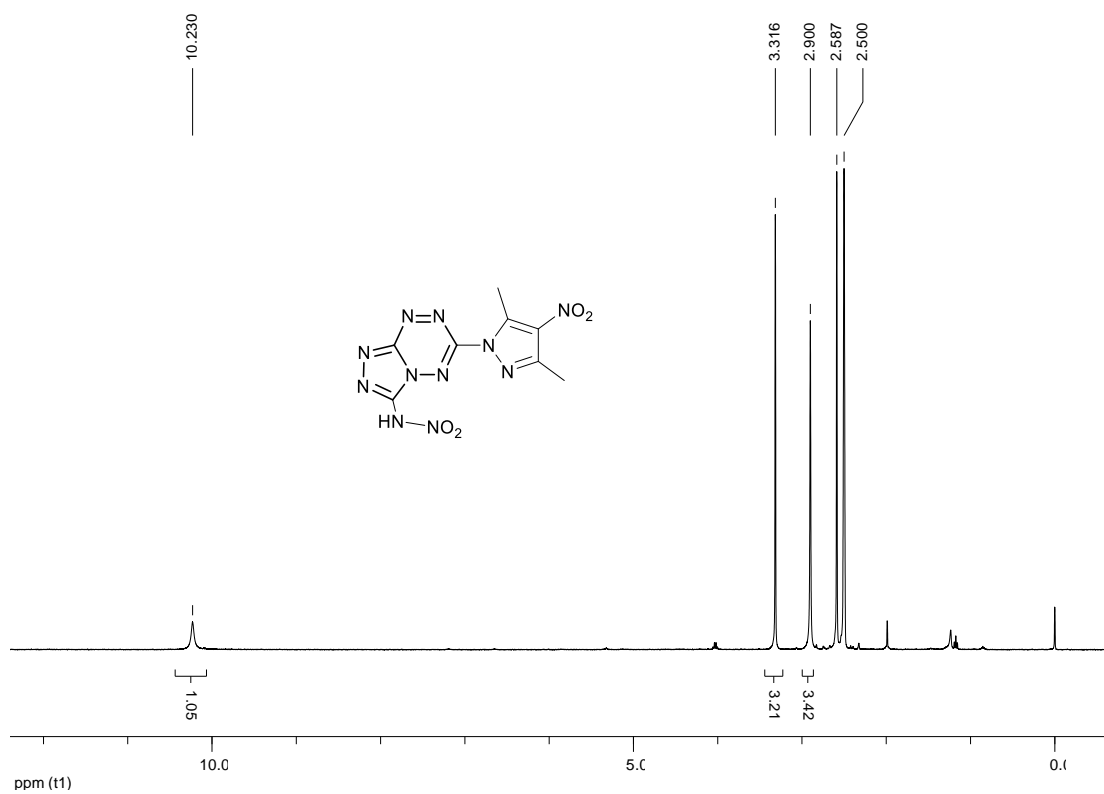

Figure S16 <sup>1</sup>H NMR of 2e.

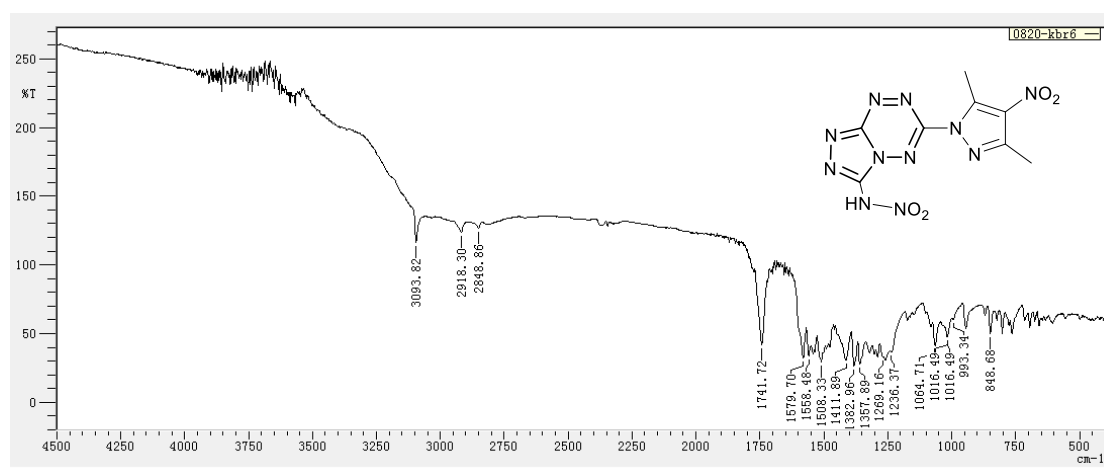

Figure S17 IR of 2e.

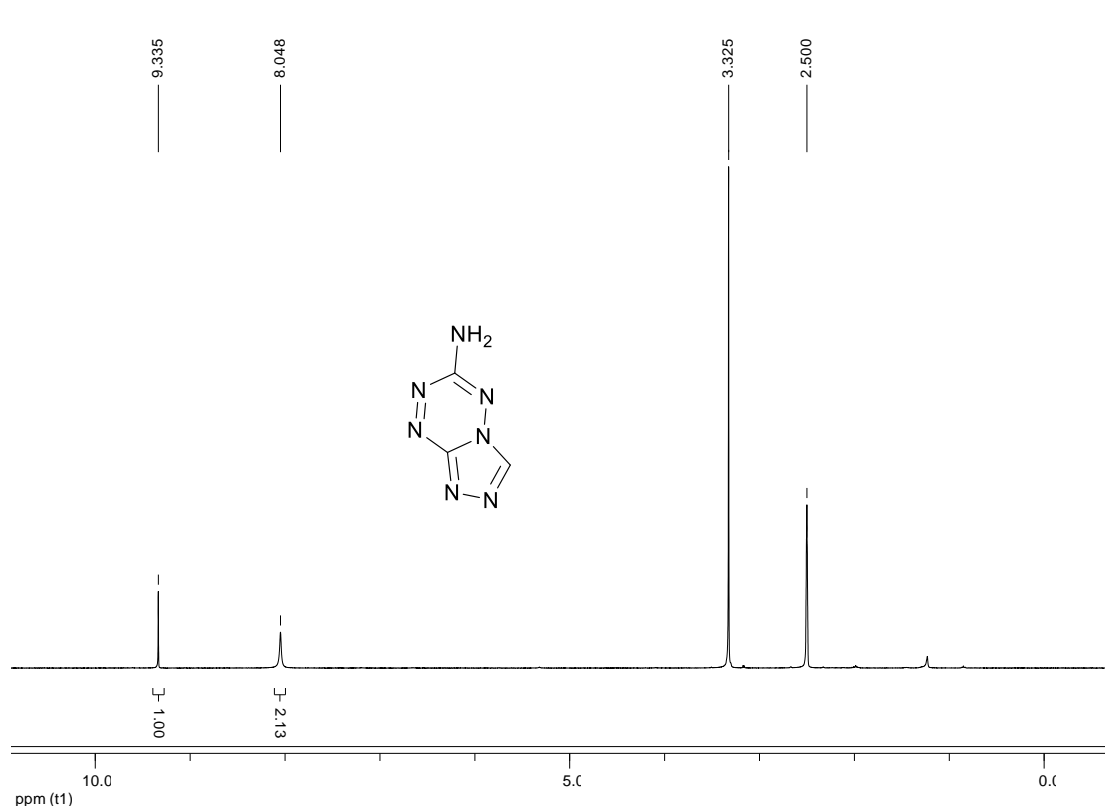

Figure S18  $^1\text{H}$  NMR of 3a. [S2]

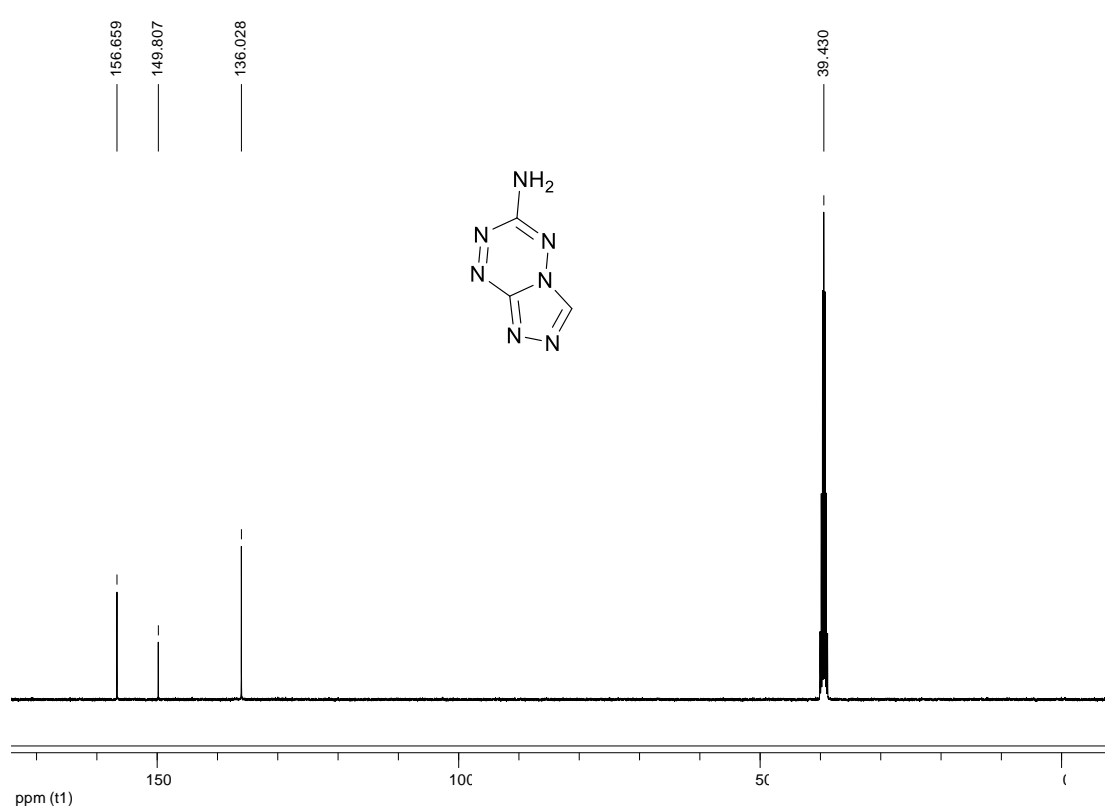

Figure S19  $^{13}\text{C}$  NMR of 3a. [S2]

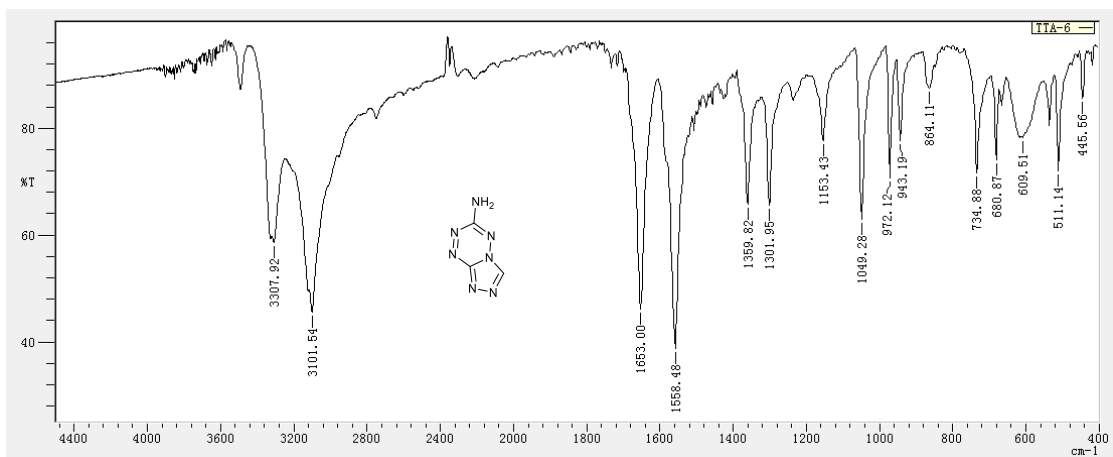

Figure S20 IR of 3a. [S2]

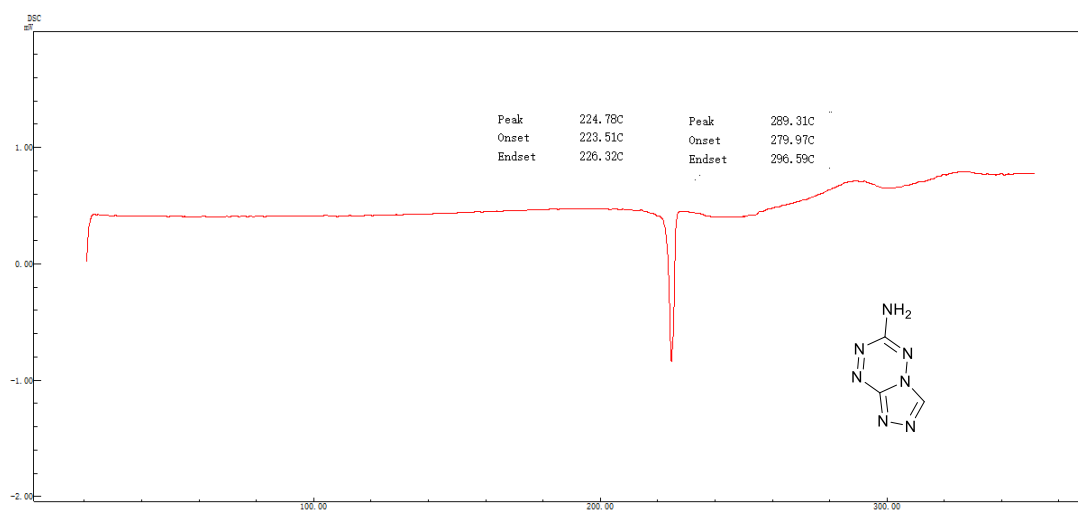

Figure S21 DSC curve of 3a (5 °C/min). [S2]

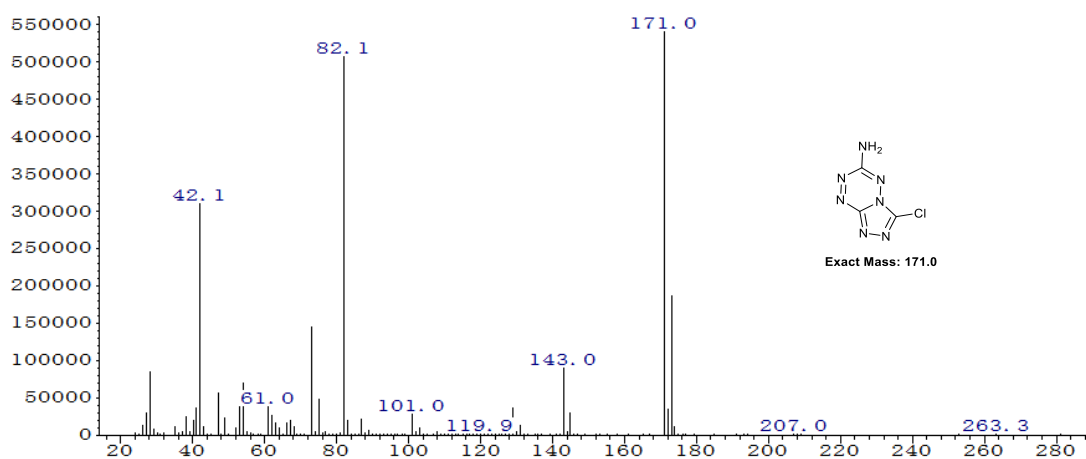

Figure S22 GC-MS of 3b.

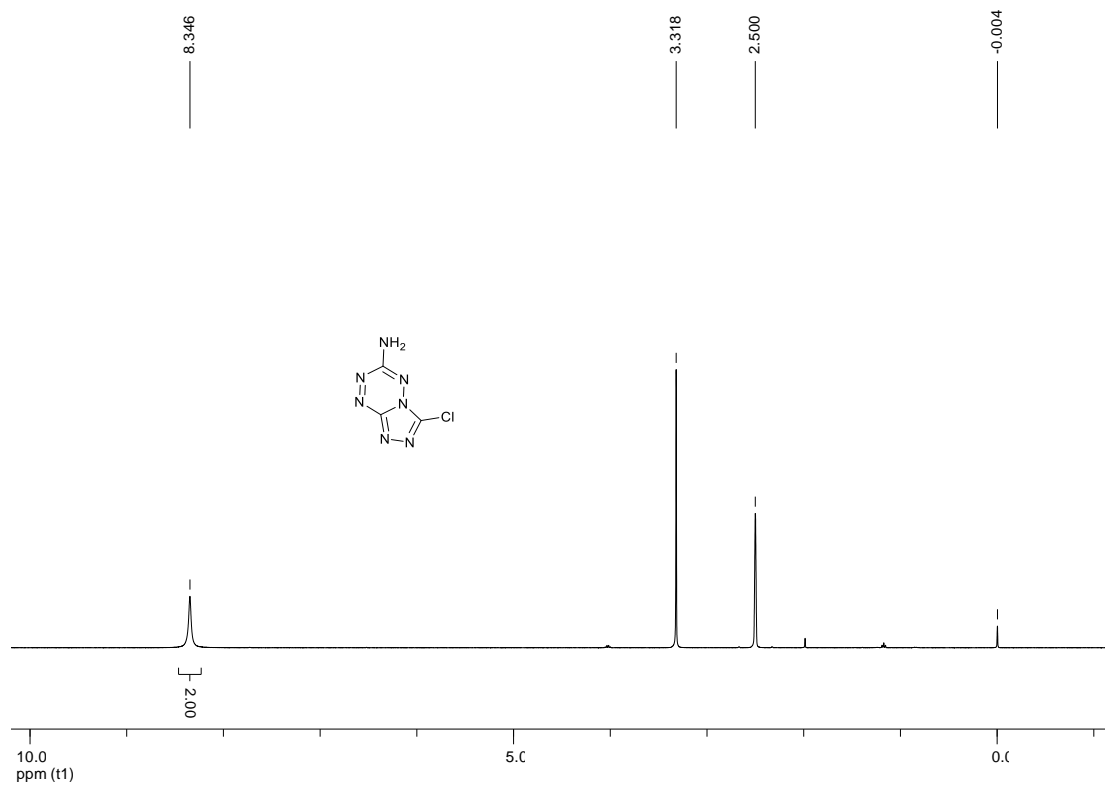

Figure S23  $^1\text{H}$  NMR spectra of 3b.

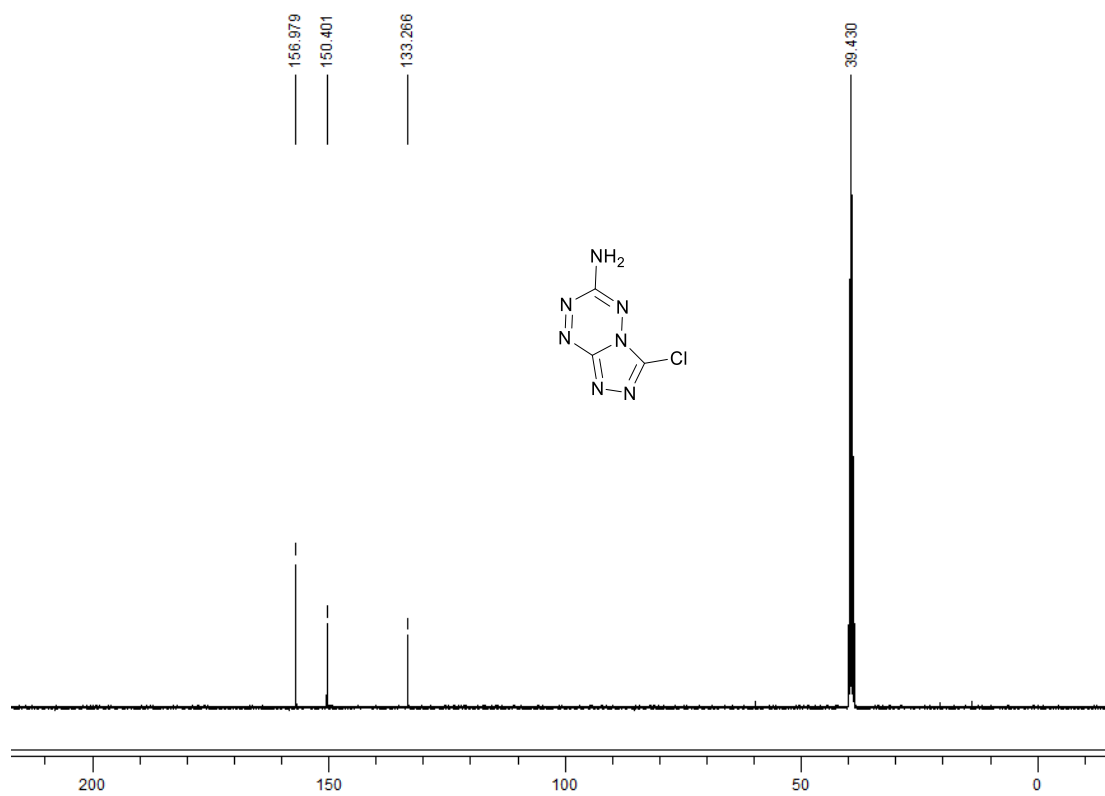

Figure S24  $^{13}\text{C}$  NMR of 3b.

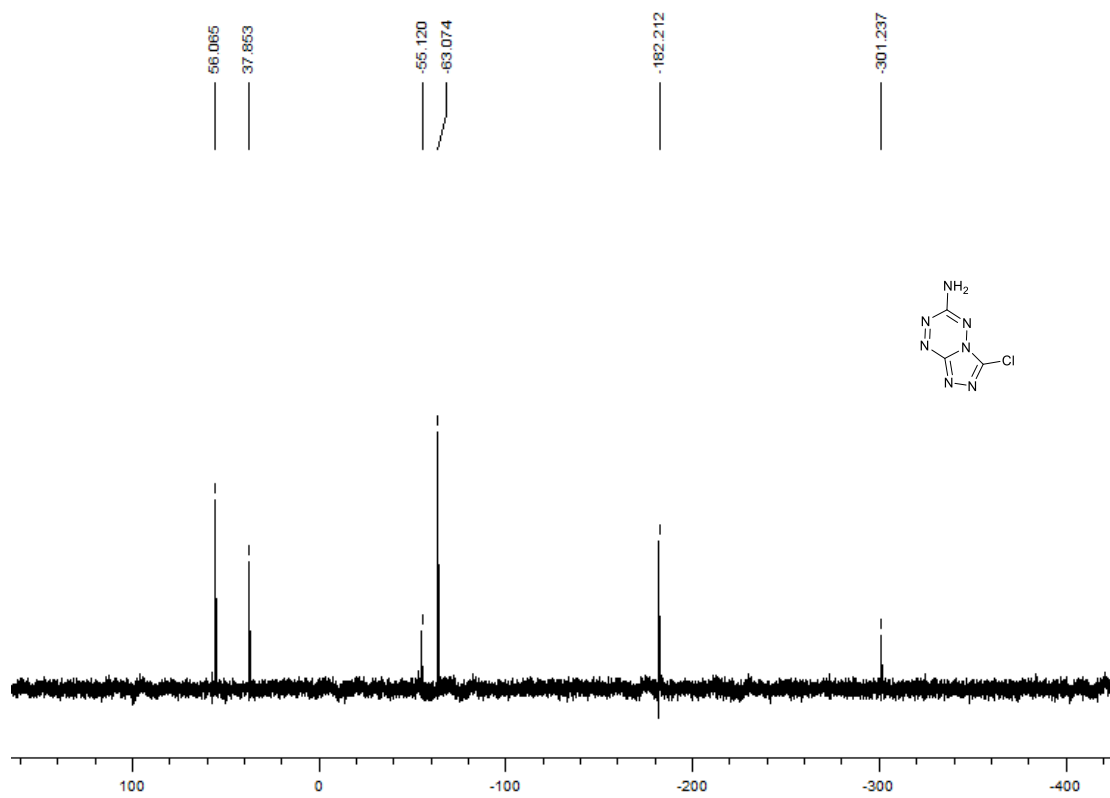

Figure S25  $^{15}\text{N}$  NMR of 3b.

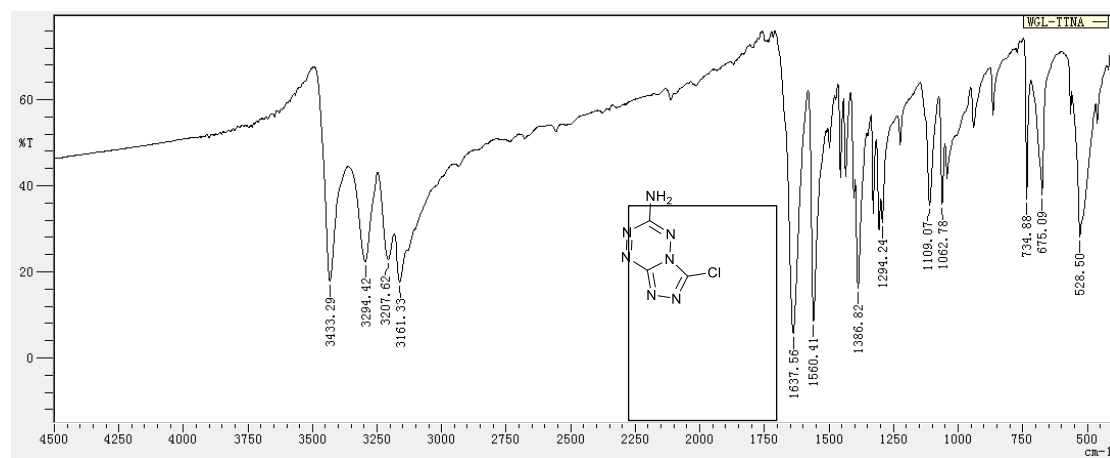

Figure S26 IR of 3b.



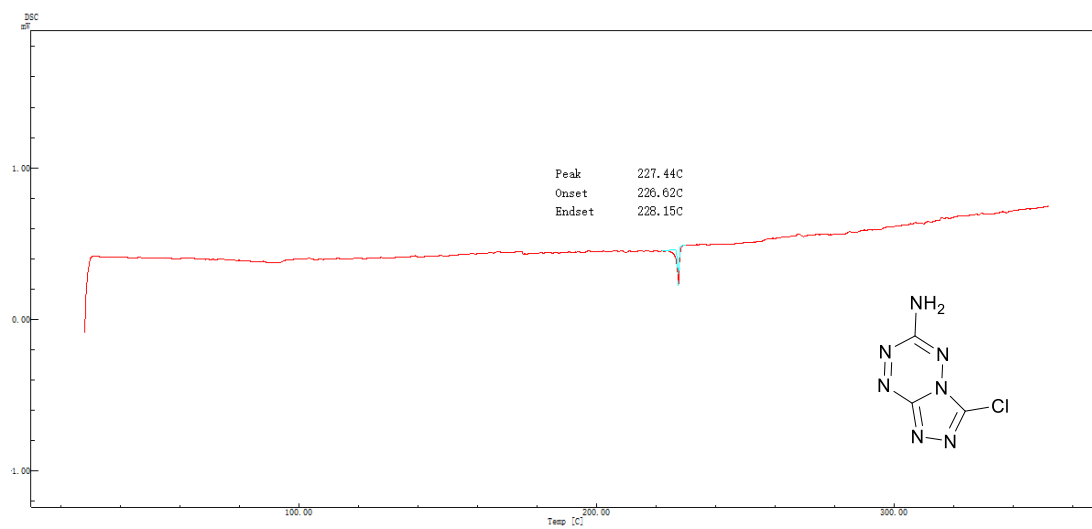

Figure S27 DSC curve of **3b** (5 °C/min).

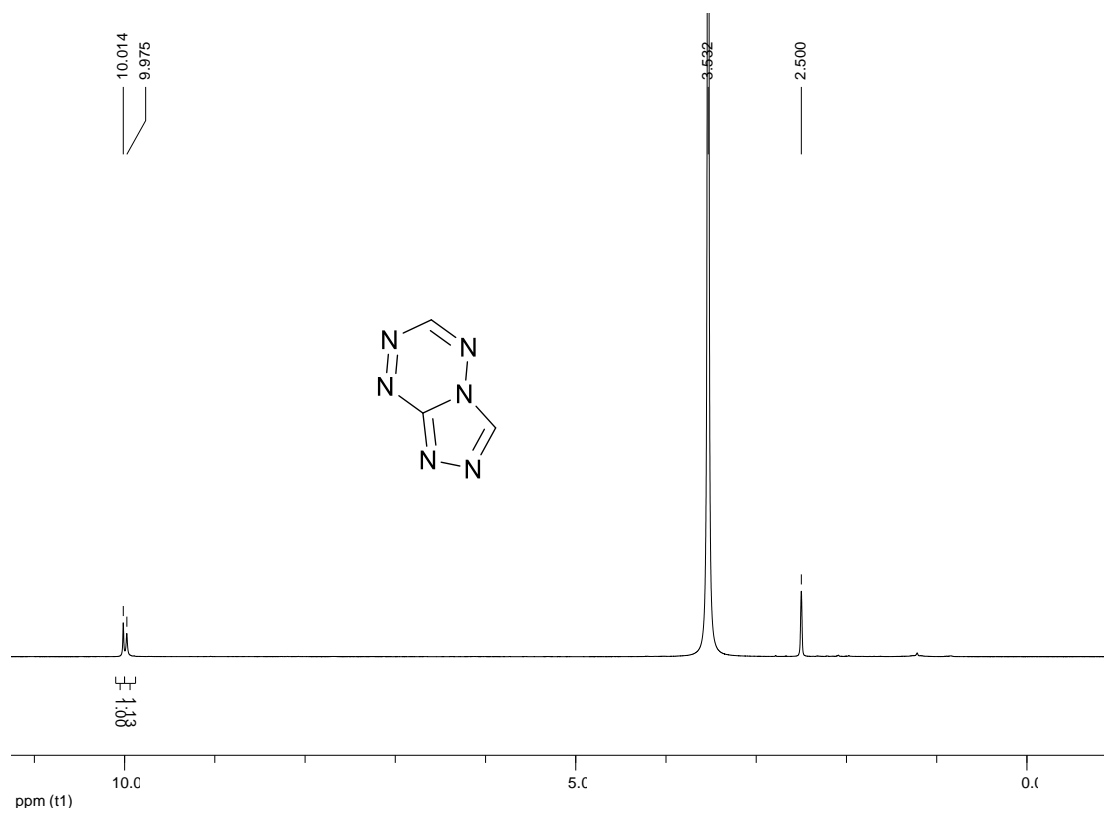

Figure S28  $^1\text{H}$  NMR of **4**.<sup>[S2]</sup>

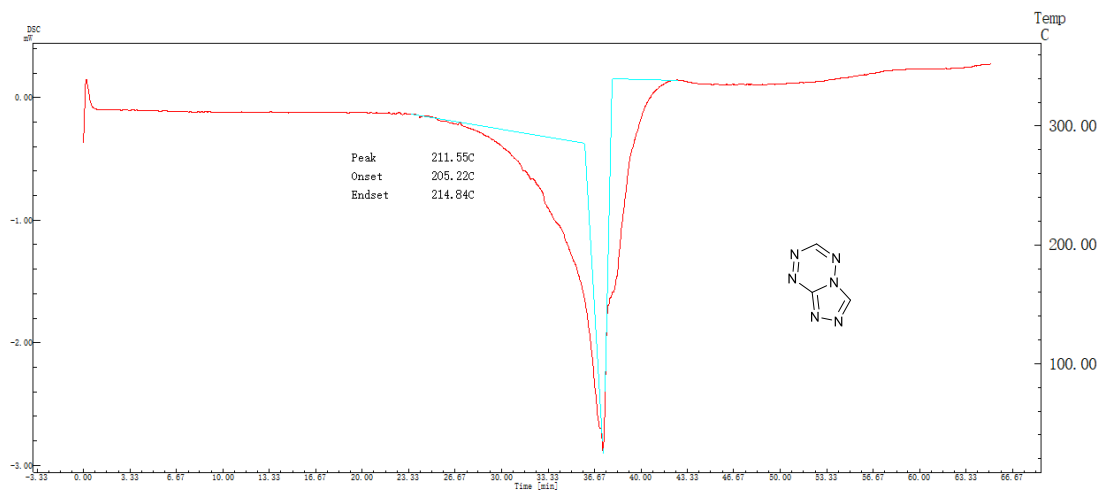

Figure S29 DSC curve of **4** (5 °C/min). [S2]

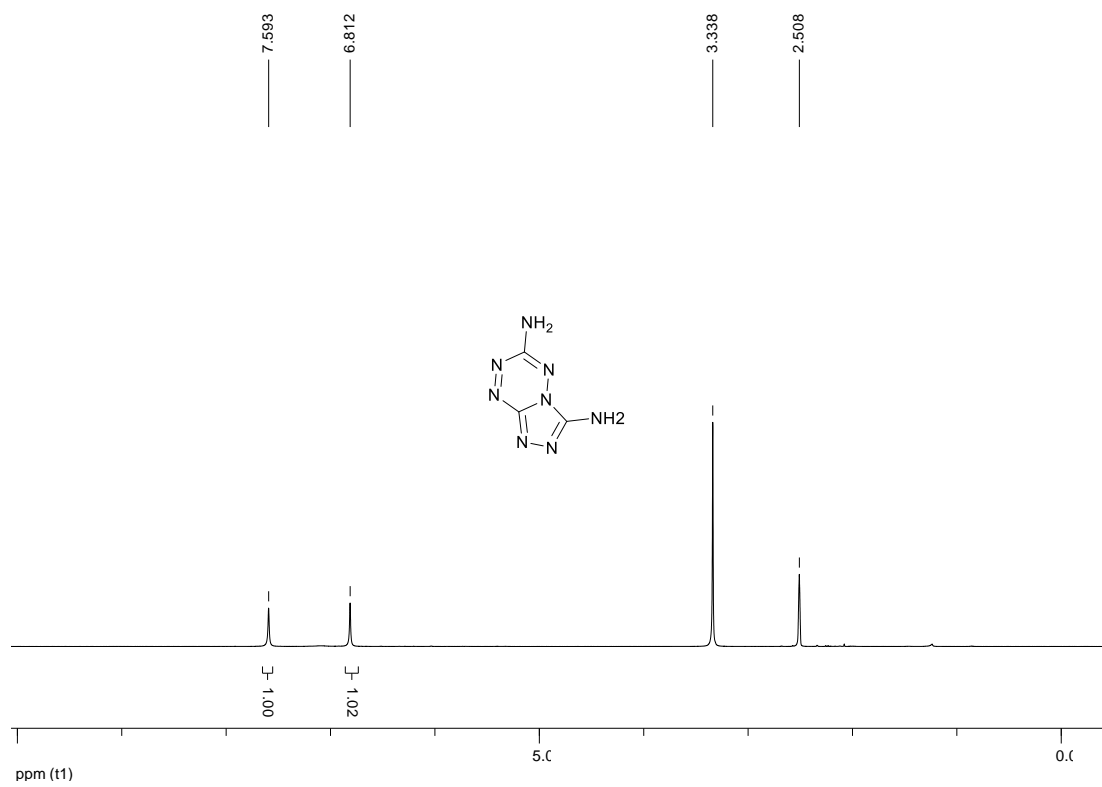

Figure S30  $^1\text{H}$  NMR of **5**. [S2]

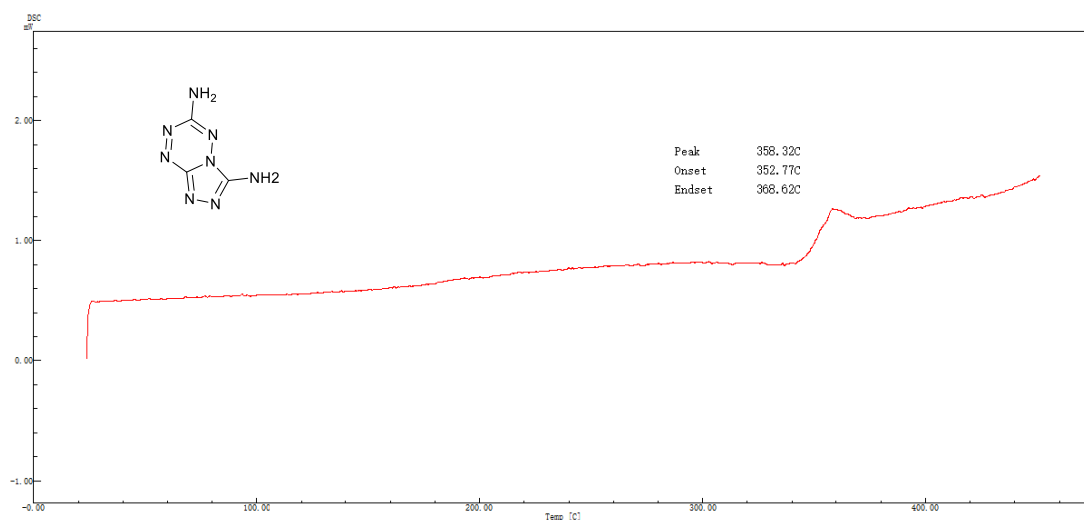

Figure S31 DSC curve of **5** (5 °C/min). [S2]

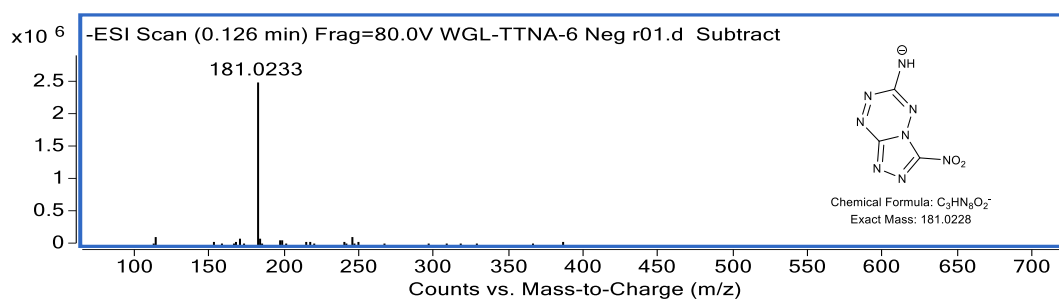

Figure S32 ESI-MS of **TTNA**.

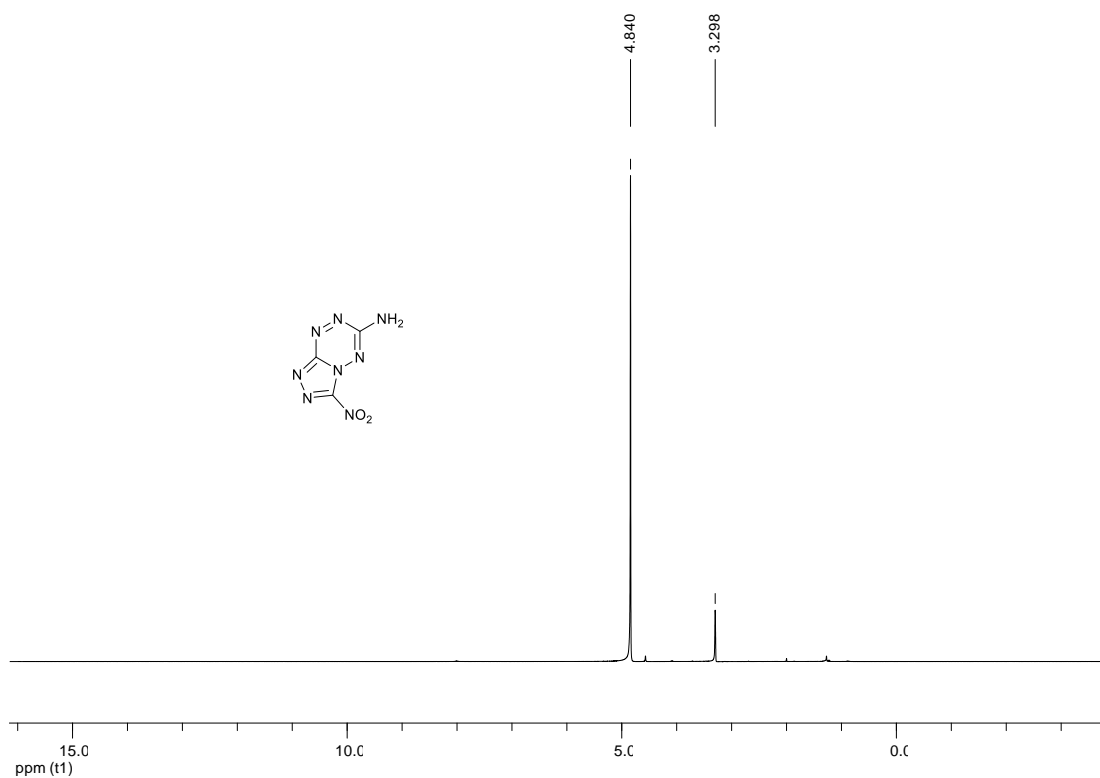

Figure S33 <sup>1</sup>H NMR of **TTNA**.

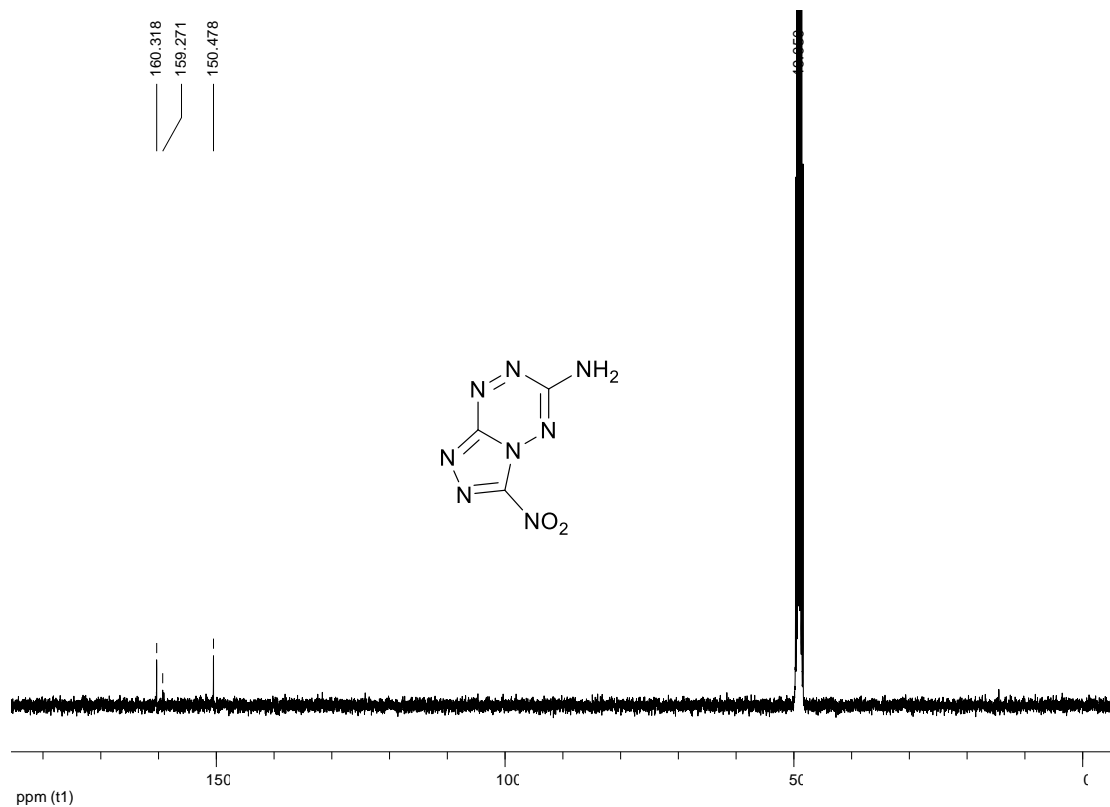

Figure S34 <sup>13</sup>C NMR of TTNA.

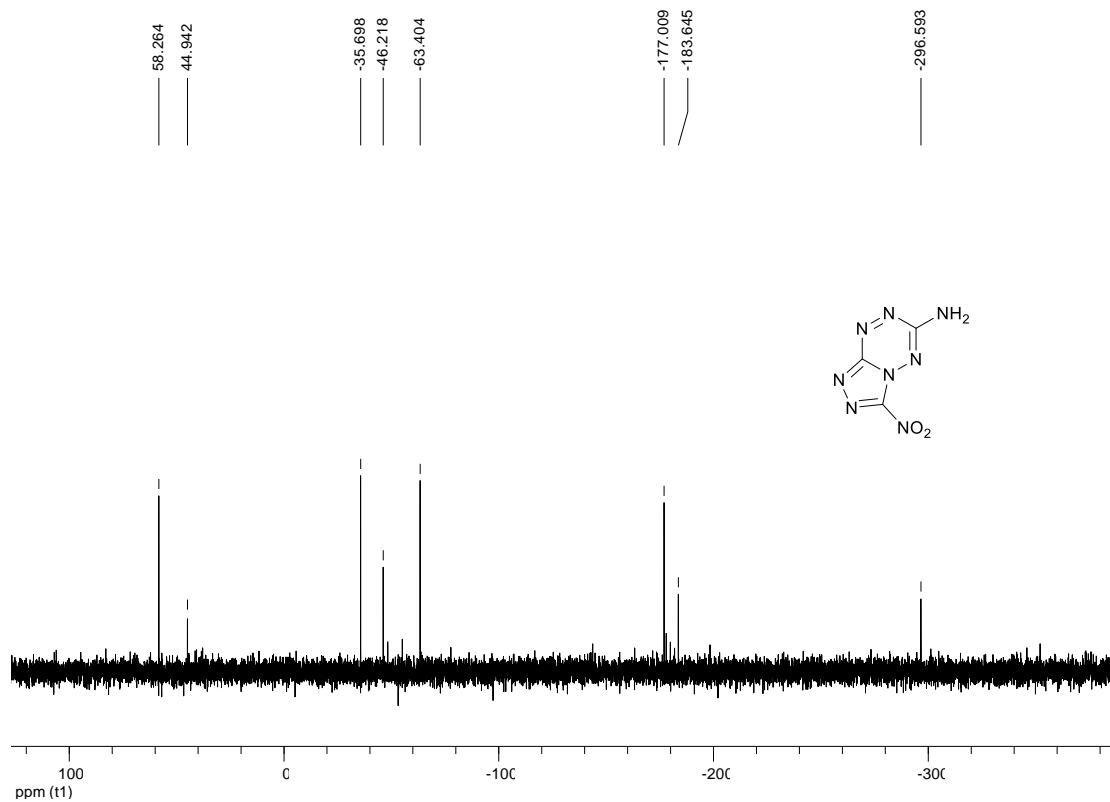

Figure S35 <sup>15</sup>N NMR of TTNA.

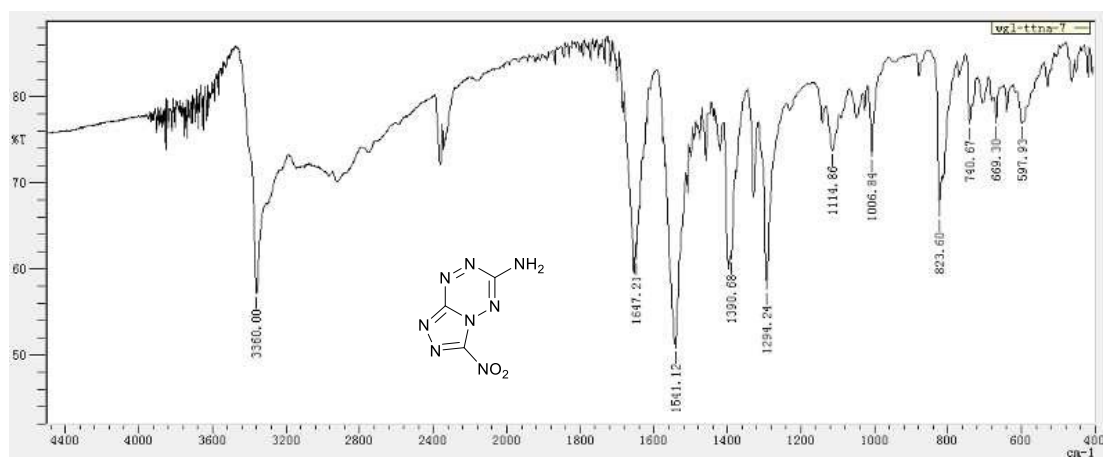

Figure S36 IR of TTNA.

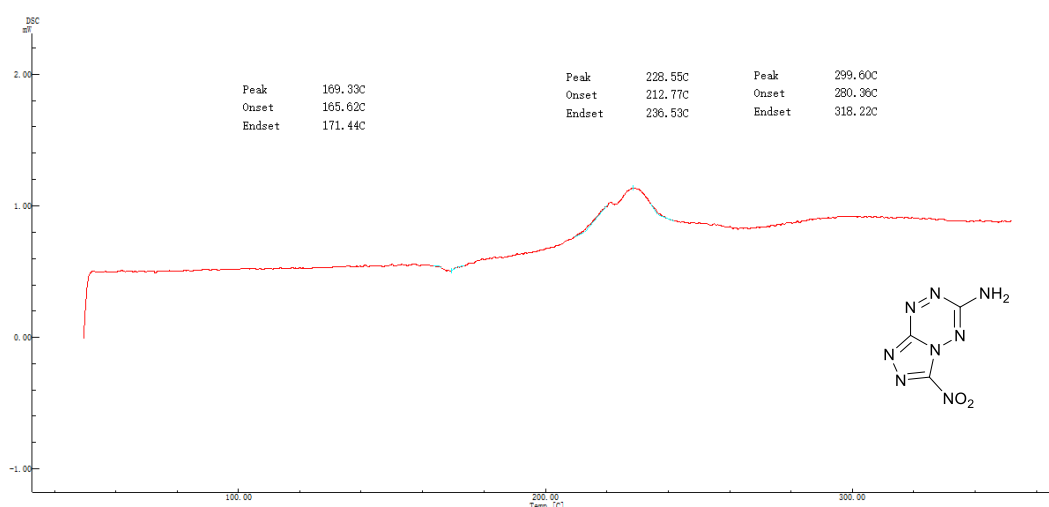

Figure S37 DSC curve of TTNA (5 °C/min).

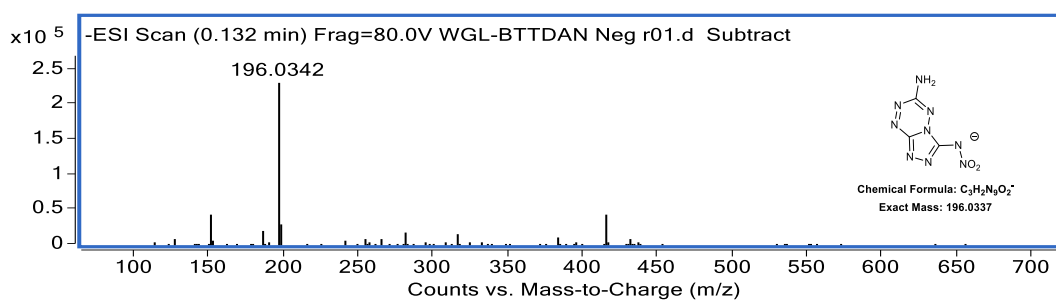

Figure S38 ESI-MS of TTDAN.

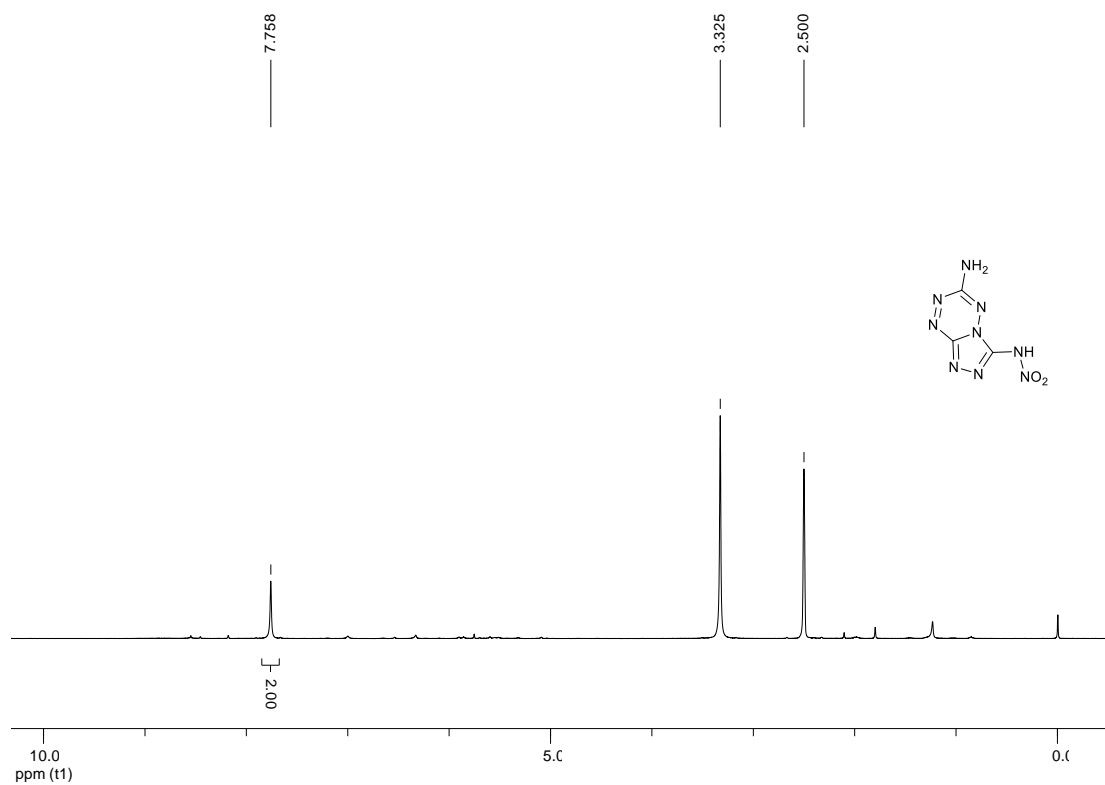

**Figure S39**  $^1\text{H}$  NMR of TTDAN.

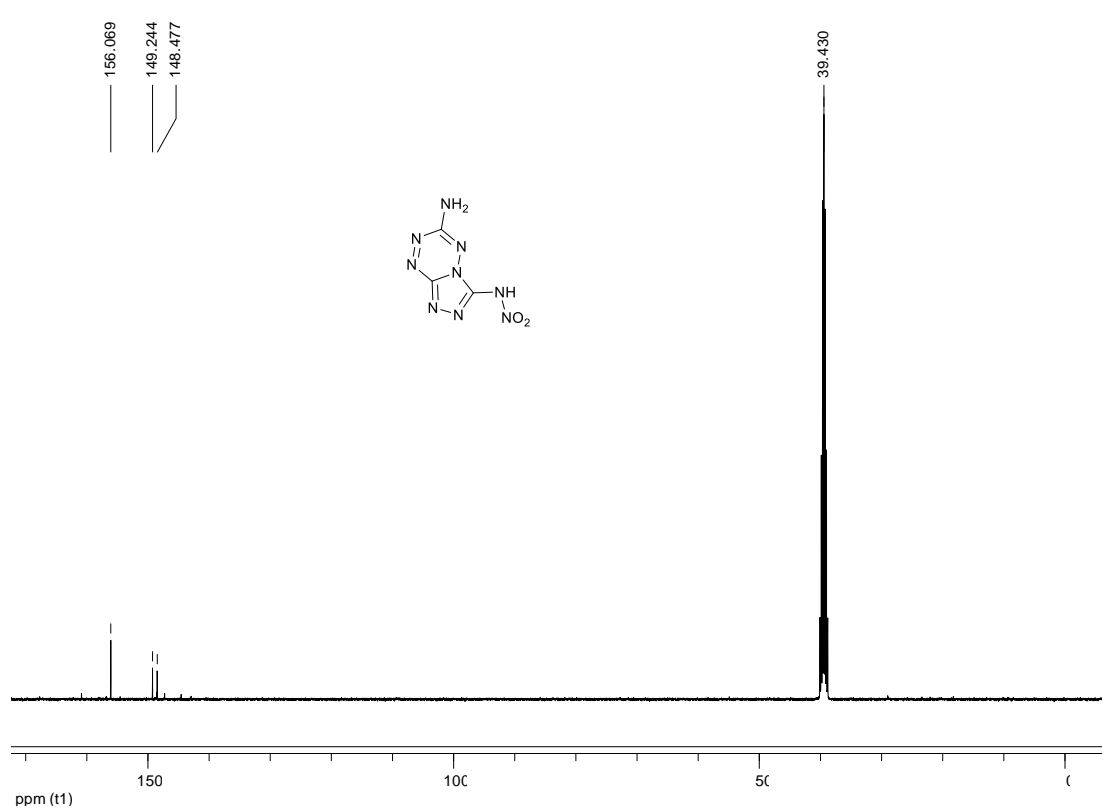

**Figure S40**  $^{13}\text{C}$  NMR of TTDAN.

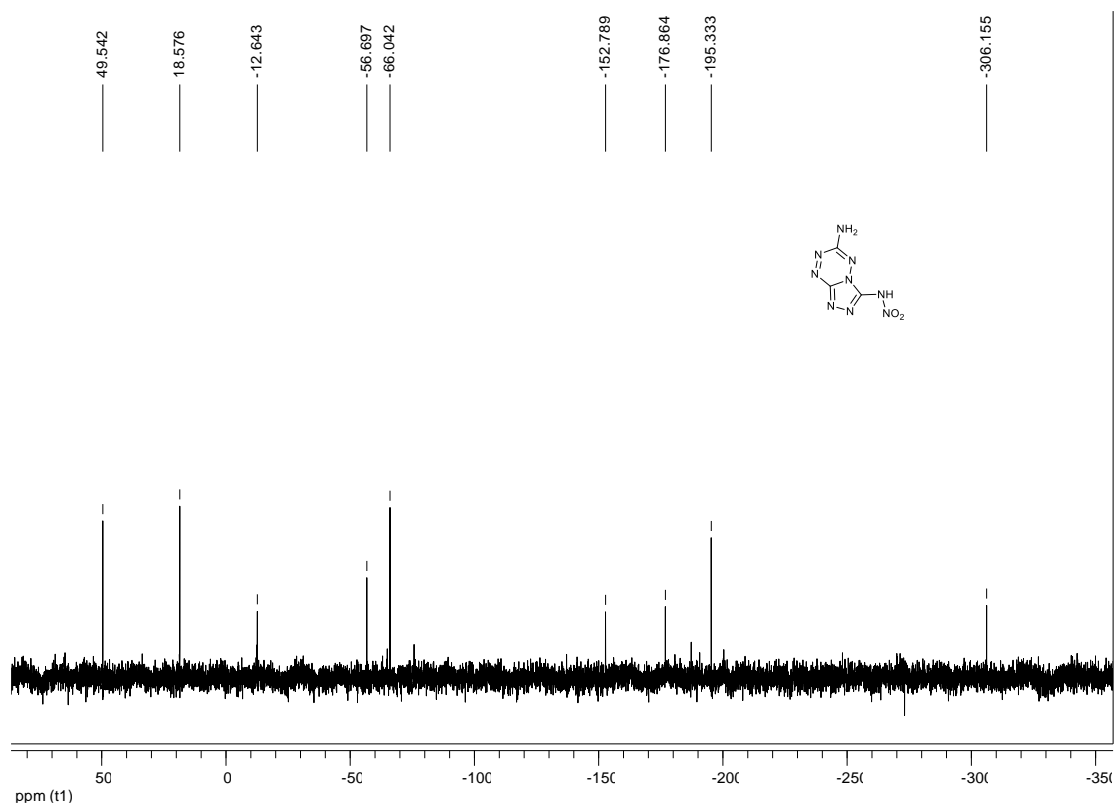

Figure S41  $^{15}\text{N}$  NMR of TTDAN.

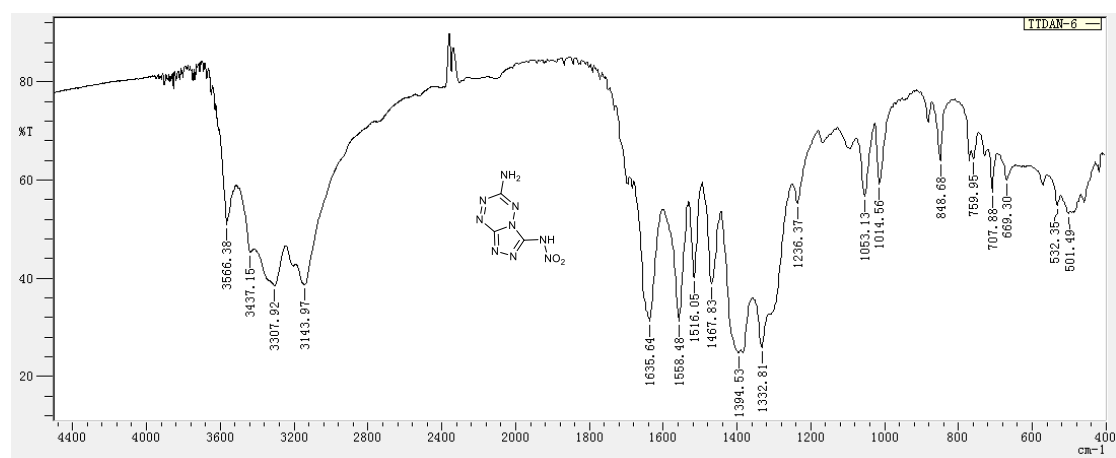

Figure S42 IR of TTDAN

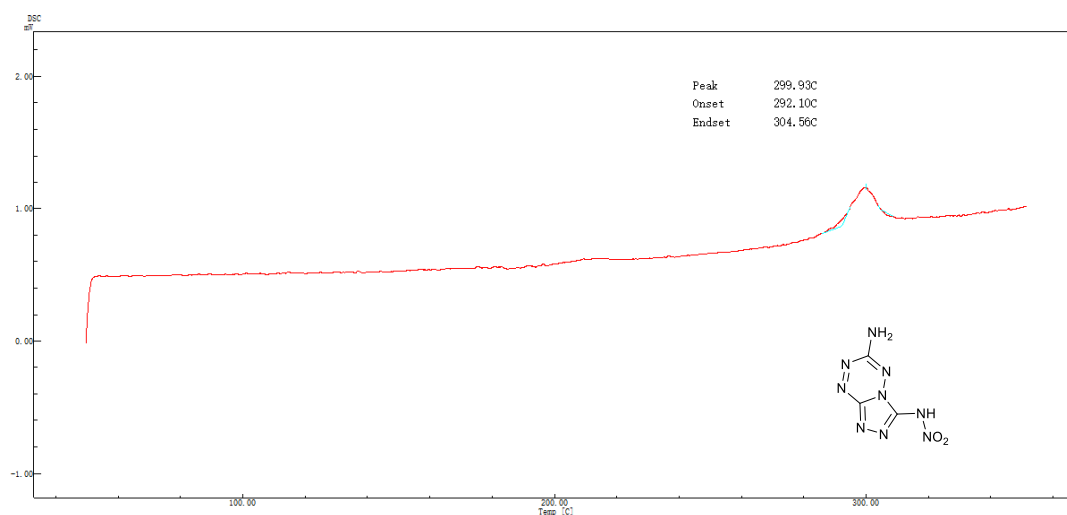

**Figure S43** DSC curve of **TTDAN** (5 °C/min).

## 6. References

- [S1] G. M. Sheldrick, SHELXTL-97, Structure Determination Software Suite, Bruker AXS, Madison, **2008**.  
[S2] D. E. Chavez, M. A. Hiskey, *J. Heterocyclic Chem.*, **1998**, 35, 1329–1332.
